# Supplementary material for: Assessment framework to predict sensitivity of marine calcifiers to ocean alkalinity enhancement – identification of biological thresholds and importance of precautionary principle
Source: Copernicus journal article supplement (doi:10.5194/bg-22-473-2025), 2025-01-28

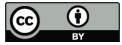

*Supplement of*

**Assessment framework to predict sensitivity of marine calcifiers to ocean alkalinity enhancement – identification of biological thresholds and importance of precautionary principle**

**Nina Bednaršek et al.**

*Correspondence to:* Nina Bednaršek (nina.bednarsek@oregonstate.edu)

The copyright of individual parts of the supplement might differ from the article licence.

**Table S1:** Ten representative data points of chemical data for TA:DIC vs  $\text{pH}_T$  and  $\Omega_{ar}$  from the experimental OA treatments (see Fig. S2).

| TA:DIC | $\text{pH}_T$ | $\Omega_{ar}$ |
|--------|---------------|---------------|
| 1.003  | 0.77          | 7.55          |
| 1.027  | 0.85          | 7.49          |
| 1.041  | 1.18          | 7.84          |
| 1.054  | 1.63          | 7.72          |
| 1.067  | 1.92          | 7.70          |
| 1.079  | 2.32          | 8.04          |
| 1.086  | 2.25          | 7.78          |
| 1.105  | 2.49          | 8.05          |
| 1.106  | 2.95          | 7.83          |
| 1.119  | 3.04          | 8.00          |
| 1.133  | 3.21          | 8.06          |
| 1.140  | 3.21          | 8.02          |
| 1.149  | 3.25          | 8.15          |
| 1.172  | 4.28          | 8.04          |
| 1.180  | 4.52          | 8.01          |

**Table S2:** Inflection points of the quadratic regressions for the parabolic responders. This indicates at what TA:DIC the calcification rate changes slope (i.e. at what TA:DIC the calcification rate starts decreasing with increasing TA:DIC).

| Group           | Species                      | Rate unit                       | Inflection point (TA:DIC) |
|-----------------|------------------------------|---------------------------------|---------------------------|
| Algae           | <i>Halimeda macroloba</i>    | mmol/g/hr                       | 1.15                      |
| Algae           | <i>Halimeda macroloba</i>    | mmol/hr                         | 1.08                      |
| Algae           | <i>Neogoniolithon sp.</i>    | mmol/g/hr                       | 1.09                      |
| Algae           | <i>Sporolithon durum</i>     | mmol/m <sup>2</sup> /hr         | 1.15                      |
| Coccolithophore | <i>Emiliana huxleyi</i>      | mmol/#/hr                       | 1.23                      |
| Coral           | <i>Acropora pulchra</i>      | mmol/m <sup>2</sup> /hr         | 1.19                      |
| Coral           | <i>Oculina arbuscula</i>     | mmol/g/hr                       | 1.10                      |
| Coral           | <i>Pavona cactus</i>         | mmol/m <sup>2</sup> /hr         | 1.19                      |
| Dinoflagellate  | <i>Thoracosphaera heimii</i> | mmol/hr                         | 1.13                      |
| Echinoderm      | <i>Arbacia punctulata</i>    | mmol/g/hr                       | 1.04                      |
| Foraminifera    | <i>Amphistegina lessonii</i> | %/hr                            | 1.10                      |
| Gastropod       | <i>Crepidula fornicata</i>   | mmol/g/hr                       | 1.09                      |
| Gastropod       | <i>Nassarius corniculus</i>  | mmol/g/hr                       | 1.06                      |
| Pteropod        | <i>Limacina helicina</i>     | $\mu\text{m}$ (shell thickness) | 1.07                      |

**Table S3:** Current calcification rate baselines computed for each species included in this study. Each baseline was computed using a pH of 8.1 and a pCO<sub>2</sub> of 425 ppm, using the average temperature and salinity at which experiments were done per species rate group, [SiO<sub>2</sub>] = 50 umol/kg, [PO<sub>4</sub><sup>3-</sup>] = 0.5 umol/kg). Calculations were carried out with the Python version of CO2SYS (Humphreys et al., 2022) using the stoichiometric dissociation constants for carbonic acid from Sulpis et al. (2020), for sulfuric acid by Dickson et al. (1990) and for total boron from Uppström (1974).

| Group           | Species                                | Rate                    | Average Temperature [°C] | Average Salinity | Baseline |
|-----------------|----------------------------------------|-------------------------|--------------------------|------------------|----------|
| Algae           | <i>Amphiroa tribulus</i>               | mmol/m <sup>2</sup> /hr | 30.98                    | 36.19            | 1.197    |
| Algae           | <i>Halimeda cylindracea</i>            | mmol/hr                 | 31.00                    | 33.00            | 1.183    |
| Algae           | <i>Halimeda macroloba</i>              | mmol/g/hr               | 27.23                    | 36.27            | 1.176    |
| Algae           | <i>Halimeda macroloba</i>              | mmol/m <sup>2</sup> /hr | 25.22                    | 34.40            | 1.158    |
| Algae           | <i>Halimeda macroloba</i>              | mmol/hr                 | 31.00                    | 33.00            | 1.183    |
| Algae           | <i>Halimeda minima</i>                 | mmol/g/hr               | 27.24                    | 36.31            | 1.176    |
| Algae           | <i>Halimeda opuntia</i>                | mmol/m <sup>2</sup> /hr | 25.22                    | 34.40            | 1.158    |
| Algae           | <i>Hydrolithon reinboldii</i>          | mmol/g/hr               | 26.98                    | 36.00            | 1.173    |
| Algae           | <i>Hydrolithon reinboldii</i>          | mmol/m <sup>2</sup> /hr | 26.50                    | 36.20            | 1.172    |
| Algae           | <i>Lithophyllum flavescens</i>         | mmol/g/hr               | 27.23                    | 36.28            | 1.176    |
| Algae           | <i>Lithophyllum sp.</i>                | mmol/g/hr               | 28.97                    | 32.20            | 1.168    |
| Algae           | <i>Lithothamnion sp.</i>               | mmol/m <sup>2</sup> /hr | 30.98                    | 36.19            | 1.197    |
| Algae           | <i>Neogoniolithon brassica-florida</i> | mmol/m <sup>2</sup> /hr | 29.99                    | 38.00            | 1.199    |
| Algae           | <i>Neogoniolithon sp.</i>              | mmol/g/hr               | 25.00                    | 31.70            | 1.146    |
| Algae           | <i>Neogoniolithon sp.</i>              | mmol/m <sup>2</sup> /hr | 22.13                    | 35.35            | 1.146    |
| Algae           | <i>Porolithon onkodes</i>              | mmol/m <sup>2</sup> /hr | 27.26                    | 35.74            | 1.174    |
| Algae           | <i>Sporolithon durum</i>               | mmol/m <sup>2</sup> /hr | 20.60                    | 35.87            | 1.140    |
| Annelid         | <i>Hydroides crucigera</i>             | mmol/g/hr               | 25.01                    | 31.63            | 1.146    |
| Coccolithophore | <i>Calcidiscus leptoporus</i>          | mmol/#/hr               | 19.75                    | 32.25            | 1.124    |
| Coccolithophore | <i>Emiliana huxleyi</i>                | mmol/#/hr               | 17.30                    | 35.12            | 1.123    |
| Coccolithophore | <i>Pleurochrysis carterae</i>          | mmol/m <sup>3</sup> /hr | 25.00                    | 35.00            | 1.159    |
| Coccolithophore | <i>Pleurochrysis carterae</i>          | mmol/#                  | 16.56                    | 32.10            | 1.110    |
| Coral           | <i>Acropora millepora</i>              | mmol/m <sup>2</sup> /hr | 25.22                    | 34.40            | 1.158    |
| Coral           | <i>Acropora pulchra</i>                | mmol/m <sup>2</sup> /hr | 27.30                    | 36.27            | 1.176    |
| Coral           | <i>Acropora solitaryensis</i>          | mmol/m <sup>2</sup> /hr | 19.83                    | 34.00            | 1.130    |
| Coral           | <i>Acropora yongei</i>                 | mmol/m <sup>2</sup> /hr | 20.60                    | 35.87            | 1.140    |
| Coral           | <i>Duncanopsammia axifuga</i>          | mmol/m <sup>2</sup> /hr | 27.00                    | 35.00            | 1.170    |
| Coral           | <i>Goniopora sp.</i>                   | mmol/m <sup>2</sup> /hr | 26.50                    | 36.20            | 1.172    |
| Coral           | <i>Lophelia pertusa</i>                | mmol/g/hr               | 7.50                     | 34.60            | 1.082    |
| Coral           | <i>Montastraea cavernosa</i>           | mmol/m <sup>2</sup> /hr | 27.00                    | 35.00            | 1.170    |
| Coral           | <i>Oculina arbuscula</i>               | mmol/g/hr               | 25.01                    | 31.61            | 1.146    |
| Coral           | <i>Pavona cactus</i>                   | mmol/m <sup>2</sup> /hr | 27.23                    | 36.28            | 1.176    |
| Coral           | <i>Plesiastrea versipora</i>           | mmol/m <sup>2</sup> /hr | 20.64                    | 36.30            | 1.142    |
| Coral           | <i>Pocillopora damicornis</i>          | mmol/g/hr               | 27.42                    | 35.00            | 1.172    |

| Group          | Species                            | Rate                             | Average Temperature [°C] | Average Salinity | Baseline |
|----------------|------------------------------------|----------------------------------|--------------------------|------------------|----------|
| Coral          | <i>Pocillopora damicornis</i>      | mmol/m <sup>2</sup> /hr          | 25.77                    | 35.86            | 1.166    |
| Coral          | <i>Pocillopora verrucosa</i>       | mmol/m <sup>2</sup> /hr          | 27.01                    | 35.61            | 1.172    |
| Coral          | <i>Porites heronensis</i>          | mmol/m <sup>2</sup> /hr          | 19.83                    | 34.00            | 1.130    |
| Coral          | <i>Porites rus</i>                 | mmol/m <sup>2</sup> /hr          | 27.23                    | 36.28            | 1.176    |
| Coral          | <i>Siderastrea radians</i>         | mmol/m <sup>2</sup> /hr          | 25.73                    | 37.55            | 1.173    |
| Coral          | <i>Solenastrea hyades</i>          | mmol/m <sup>2</sup> /hr          | 25.43                    | 38.18            | 1.174    |
| Coral          | <i>Stylophora pistillata</i>       | mmol/m <sup>2</sup> /hr          | 25.83                    | 40.00            | 1.183    |
| Crustacean     | <i>Amphibalanus improvisus</i>     | mmol/g/hr                        | 19.50                    | 17.00            | 1.074    |
| Crustacean     | <i>Callinectes sapidus</i>         | mmol/g/hr                        | 25.00                    | 31.95            | 1.147    |
| Crustacean     | <i>Homarus americanus</i>          | mmol/g/hr                        | 25.02                    | 31.96            | 1.147    |
| Crustacean     | <i>Penaeus plebejus</i>            | mmol/g/hr                        | 25.00                    | 31.95            | 1.147    |
| Crustacean     | <i>Semibalanus balanoides</i>      | mmol/g/hr                        | 7.41                     | 33.65            | 1.079    |
| Dinoflagellate | <i>Alexandrium sp.</i>             | 1/hr                             | 18.00                    | 35.00            | 1.125    |
| Dinoflagellate | <i>Ceratium lineatum</i>           | #/hr                             | 15.00                    | 30.00            | 1.098    |
| Dinoflagellate | <i>Gonyaulax sp.</i>               | 1/hr                             | 18.00                    | 35.00            | 1.125    |
| Dinoflagellate | <i>Heterocapsa triquetra</i>       | #/hr                             | 15.00                    | 30.00            | 1.098    |
| Dinoflagellate | <i>Karenia mikimotoi</i>           | 1/hr                             | 25.00                    | 30.00            | 1.140    |
| Dinoflagellate | <i>Lingulodinium polyedrum</i>     | 1/hr                             | 18.00                    | 35.00            | 1.125    |
| Dinoflagellate | <i>Prorocentrum micans</i>         | 1/hr                             | 18.00                    | 35.00            | 1.125    |
| Dinoflagellate | <i>Prorocentrum minimum</i>        | #/hr                             | 15.00                    | 30.00            | 1.098    |
| Dinoflagellate | <i>Symbiodinium sp.</i>            | #/hr                             | 26.00                    | 35.00            | 1.164    |
| Dinoflagellate | <i>Thoracosphaera heimii</i>       | mmol/hr                          | 15.00                    | 34.00            | 1.109    |
| Echinoderm     | <i>Arbacia punctulata</i>          | mmol/g/hr                        | 25.01                    | 31.78            | 1.147    |
| Echinoderm     | <i>Echinometra viridis</i>         | %                                | 25.53                    | 32.07            | 1.150    |
| Echinoderm     | <i>Echinometra viridis</i>         | %/hr                             | 25.20                    | 32.07            | 1.149    |
| Echinoderm     | <i>Eucidaris tribuloides</i>       | mmol/g/hr                        | 25.01                    | 31.78            | 1.147    |
| Foraminifera   | <i>Ammonia sp.</i>                 | mmol#/hr                         | 26.00                    | 32.75            | 1.155    |
| Foraminifera   | <i>Amphistegina lessonii</i>       | %/hr                             | 24.18                    | 33.46            | 1.149    |
| Foraminifera   | <i>Globigerinella siphonifera</i>  | mmol#/hr                         | 24.56                    | 38.31            | 1.169    |
| Foraminifera   | <i>Globigerinoides ruber</i>       | mmol#/hr                         | 24.86                    | 36.08            | 1.162    |
| Foraminifera   | <i>Marginopora rossi</i>           | %/hr                             | 25.00                    | 35.00            | 1.159    |
| Foraminifera   | <i>Marginopora vertebralis</i>     | mmol/g/hr                        | 28.50                    | 35.10            | 1.178    |
| Foraminifera   | <i>Marginopora vertebralis</i>     | mmol/hr                          | 31.00                    | 33.00            | 1.183    |
| Foraminifera   | <i>Marginopora vertebralis</i>     | %/hr                             | 24.18                    | 33.46            | 1.149    |
| Foraminifera   | <i>Neogloboquadrina pachyderma</i> | mmol#/hr                         | 2.56                     | 34.50            | 1.064    |
| Foraminifera   | <i>Operculina ammonoides</i>       | mmol/g/hr                        | 25.00                    | 37.00            | 1.167    |
| Gastropod      | <i>Concholepas concholepas</i>     | mmol/g/hr                        | 17.40                    | 34.58            | 1.121    |
| Gastropod      | <i>Crepidula fornicata</i>         | mmol/g/hr                        | 15.31                    | 34.33            | 1.112    |
| Gastropod      | <i>Cyclope neritea</i>             | mmol/g/hr                        | 21.93                    | 38.00            | 1.154    |
| Gastropod      | <i>Littorina littorea</i>          | mmol/g/hr                        | 24.96                    | 31.80            | 1.147    |
| Gastropod      | <i>Littorina littorea</i>          | Calc rate (shell thickness) [μm] | 15.00                    | 35.00            | 1.112    |
| Gastropod      | <i>Nassarius corniculus</i>        | mmol/g/hr                        | 22.16                    | 38.00            | 1.156    |
| Gastropod      | <i>Strombus alatus</i>             | mmol/g/hr                        | 24.96                    | 31.80            | 1.147    |
| Gastropod      | <i>Urosalpinx cinerea</i>          | mmol/g/hr                        | 24.95                    | 31.80            | 1.147    |
| Mollusks       | <i>Argopecten irradians</i>        | mmol/g/hr                        | 25.04                    | 31.92            | 1.147    |
| Mollusks       | <i>Argopecten purpuratus</i>       | mmol/g/hr                        | 18.33                    | 34.00            | 1.124    |

| Group    | Species                          | Rate                    | Average Temperature [°C] | Average Salinity | Baseline |
|----------|----------------------------------|-------------------------|--------------------------|------------------|----------|
| Mollusks | <i>Azumapecten farreri</i>       | mmol/g/hr               | 16.00                    | 28.00            | 1.096    |
| Mollusks | <i>Cerastoderma edule</i>        | mmol/g/hr               | 16.75                    | 34.39            | 1.118    |
| Mollusks | <i>Chamelea gallina</i>          | mmol/g/hr               | 23.09                    | 33.93            | 1.146    |
| Mollusks | <i>Crassostrea gigas</i>         | mmol/g/hr               | 20.00                    | 30.00            | 1.118    |
| Mollusks | <i>Crassostrea virginica</i>     | mmol/g/hr               | 25.07                    | 27.33            | 1.130    |
| Mollusks | <i>Mercenaria mercenaria</i>     | mmol/g/hr               | 25.05                    | 31.92            | 1.147    |
| Mollusks | <i>Mya arenaria</i>              | mmol/g/hr               | 25.06                    | 31.87            | 1.147    |
| Mollusks | <i>Mytilus californianus</i>     | mmol/m <sup>2</sup> /hr | 14.42                    | 29.33            | 1.094    |
| Mollusks | <i>Mytilus edulis</i>            | mmol/g/hr               | 23.29                    | 31.24            | 1.137    |
| Mollusks | <i>Mytilus galloprovincialis</i> | mmol/g/hr               | 18.50                    | 37.98            | 1.137    |
| Mollusks | <i>Pecten maximus</i>            | mmol/g/hr               | 10.61                    | 35.23            | 1.095    |
| Pteropod | <i>Cavolinia inflexa</i>         | mm (shell length)       | 13.00                    | 38.00            | 1.112    |
| Pteropod | <i>Limacina helicina</i>         | mmol/g/hr               | 2.67                     | 34.55            | 1.065    |
| Pteropod | <i>Limacina helicina</i>         | mm (shell length)       | 5.15                     | 34.53            | 1.073    |
| Pteropod | <i>Limacina helicina</i>         | µm (shell thickness)    | 10.50                    | 32.34            | 1.087    |
| Pteropod | <i>Limacina retroversa</i>       | mm (shell length)       | 4.32                     | 34.30            | 1.070    |

**Table S4:** Studies with negative responders (linear and threshold negative, parabolic) with demonstrated TA:DIC thresholds, indicating the amount of Na<sub>2</sub>CO<sub>3</sub> needed to halve the current calcification rate (i.e. at the baseline). The value for TA:DIC threshold is used to determine the pH and Ω<sub>ar</sub> (at average temperature and average salinity per species).

| Studies                                    | Group          | Species                        | Temp (°C) | Salinity | Rate unit               | Thresh old | TA addition | pH at threshold | ΔpH from baseline | Ω <sub>ar</sub> at threshold | Exposure time                                                                                                                                  |
|--------------------------------------------|----------------|--------------------------------|-----------|----------|-------------------------|------------|-------------|-----------------|-------------------|------------------------------|------------------------------------------------------------------------------------------------------------------------------------------------|
| Noisette et al. (2016), Ries et al. (2009) | Gastropod      | <i>Crepidula fornicata</i>     | 15.31     | 34.33    | mmol/g/hr               | 1.14       | 150         | 8.20            | 0.10              | 4.08                         | 6 months<br>60 days                                                                                                                            |
| Ries et al. (2009)                         | Algae          | <i>Neogoniolithon sp.</i>      | 25.00     | 31.70    | mmol/g/hr               | 1.16       | 100         | 8.16            | 0.06              | 4.90                         | 60 days                                                                                                                                        |
| Ries et al. (2009)                         | Crustacean     | <i>Homarus americanus</i>      | 25.02     | 31.96    | mmol/g/hr               | 1.19       | 250         | 8.23            | 0.13              | 5.87                         | 60 days                                                                                                                                        |
| Ries et al. (2009)                         | Coral          | <i>Oculina arbuscula</i>       | 25.01     | 31.61    | mmol/g/hr               | 1.20       | 300         | 8.25            | 0.15              | 6.16                         | 60 days                                                                                                                                        |
| Prazeres et al. (2015)                     | Foraminifera   | <i>Amphistegina lessonii</i>   | 24.18     | 33.46    | %/hr                    | 1.21       | 350         | 8.27            | 0.17              | 6.51                         | 30 days                                                                                                                                        |
| Hansen et al. (2007)                       | Dinoflagellate | <i>Ceratium lineatum</i>       | 15.00     | 30.00    | #/hr                    | 1.18       | 500         | 8.40            | 0.30              | 5.89                         | 14 d acclimation to irradiance; 7 days acclimation to experimental conditions; 14 days exposure to irradiance; 22 days stationary growth phase |
| Sinutok et al. (2011)                      | Algae          | <i>Halimeda macroloba</i>      | 27.23     | 36.27    | mmol/g/hr               | 1.25       | 500         | 8.30            | 0.20              | 8.18                         | 2 weeks acclimation, 2 weeks incubation                                                                                                        |
| Comeau et al. (2019)                       | Algae          | <i>Sporolithon durum</i>       | 20.60     | 35.87    | mmol/m <sup>2</sup> /hr | 1.22       | 500         | 8.33            | 0.23              | 7.06                         | 27 weeks                                                                                                                                       |
| Van de Waal et al. (2013)                  | Dinoflagellate | <i>Thoracosphaera heimii</i>   | 15.00     | 34.00    | mmol/hr                 | 1.23       | 800         | 8.48            | 0.38              | 8.01                         | 21 days acclimation, 8 days experiment = total of >10 generations                                                                              |
| Oron et al. (2020)                         | Foraminifera   | <i>Operculina ammonoides</i>   | 25.00     | 37.00    | mmol/g/hr               | 1.34       | 1250        | 8.50            | 0.40              | 12.76                        | 65 - 120 hours                                                                                                                                 |
| Prazeres et al. (2015)                     | Foraminifera   | <i>Marginopora vertebralis</i> | 24.18     | 33.46    | %/hr                    | 1.34       | 1400        | 8.57            | 0.47              | 13.58                        | 30 days                                                                                                                                        |
| Camp et al. (2017), Comeau et al. (2013)   | Coral          | <i>Acropora pulchra</i>        | 27.30     | 36.27    | mmol/m <sup>2</sup> /hr | 1.38       | 1600        | 8.56            | 0.46              | 15.63                        | n/a (natural conditions)<br>2 weeks acclimation; 2 weeks incubation                                                                            |
| Hansen et al.                              | Dinoflagellate | <i>Heterocapsa</i>             | 15.00     | 30.00    | #/hr                    | 1.30       | 1450        | 8.70            | 0.60              | 12.20                        | 14 d acclimation to irradiance; 7 days                                                                                                         |

|                      |                 |                             |       |       |                         |      |       |      |      |       |                                                                                                                                                |
|----------------------|-----------------|-----------------------------|-------|-------|-------------------------|------|-------|------|------|-------|------------------------------------------------------------------------------------------------------------------------------------------------|
| al. (2007)           | gellate         | <i>triquetra</i>            |       |       |                         |      |       |      |      |       | acclimation to experimental conditions; 14 days exposure to irradiance; 22 days stationary growth phase                                        |
| Comeau et al. (2013) | Coral           | <i>Pavona cactus</i>        | 27.23 | 36.28 | mmol/m <sup>2</sup> /hr | 1.38 | 1600  | 8.56 | 0.46 | 15.61 | 2 weeks acclimation; 2 weeks incubation                                                                                                        |
| Hansen et al. (2007) | Dinoflagellate  | <i>Prorocentrum minimum</i> | 15.00 | 30.00 | #/hr                    | 1.38 | 2200  | 8.85 | 0.75 | 17.46 | 14 d acclimation to irradiance; 7 days acclimation to experimental conditions; 14 days exposure to irradiance; 22 days stationary growth phase |
| *                    | Coccolithophore | <i>Emiliana huxleyi</i>     | 17.30 | 35.12 | mmol#/hr                | 1.46 | 3100  | 8.89 | 0.79 | 24.16 | **                                                                                                                                             |
| Keul et al. (2013)   | Foraminifera    | <i>Ammonia sp.</i>          | 26.00 | 32.75 | mmol#/hr                | 1.73 | 10000 | 9.27 | 1.17 | 79.41 | 59-96 days of culturing                                                                                                                        |

\*Barcelos-Ramos et al. (2010), Fiorini et al. (2011), Iglesias-Rodriguez et al. (2008), Richier et al. (2011), Sciandra et al. (2003), Stoll et al. (2012), Gafar et al. (2018), Bach et al. (2011), Sett et al. (2014).

\*\*26hrs, Acclimation for 7 generations, experiment/sampling for 2-3 generations, n/a, 8 days, 16 days, Acclimation for 12 generations, Pre-acclimation for 8-12 generations, 9 generations, Acclimated for at ~7 generations (5-15 days)

**Table S5:** Temperature and salinity ranges for experimental OA studies per species rate group.

| Group           | Species                                | Rate unit               | Min. Temp (°C) | Max. Temp (°C) | Temp Range | Min. Sal | Max. Sal | Sal Range |
|-----------------|----------------------------------------|-------------------------|----------------|----------------|------------|----------|----------|-----------|
| Algae           | <i>Amphiroa tribulus</i>               | mmol/m <sup>2</sup> /hr | 29.98          | 32.00          | 2.02       | 36.19    | 36.19    | 0.00      |
| Algae           | <i>Halimeda cylindracea</i>            | mmol/hr                 | 28.00          | 34.00          | 6.00       | 33.00    | 33.00    | 0.00      |
| Algae           | <i>Halimeda macroloba</i>              | mmol/g/hr               | 27.10          | 27.30          | 0.20       | 36.10    | 36.40    | 0.30      |
| Algae           | <i>Halimeda macroloba</i>              | mmol/hr                 | 25.00          | 25.40          | 0.40       | 34.40    | 34.40    | 0.00      |
| Algae           | <i>Halimeda macroloba</i>              | mmol/m <sup>2</sup> /hr | 28.00          | 34.00          | 6.00       | 33.00    | 33.00    | 0.00      |
| Algae           | <i>Halimeda minima</i>                 | mmol/g/hr               | 27.10          | 27.30          | 0.20       | 36.10    | 36.40    | 0.30      |
| Algae           | <i>Halimeda opuntia</i>                | mmol/m <sup>2</sup> /hr | 25.00          | 25.40          | 0.40       | 34.40    | 34.40    | 0.00      |
| Algae           | <i>Hydrolithon reinboldii</i>          | mmol/m <sup>2</sup> /hr | 26.90          | 27.10          | 0.20       | 36.00    | 36.00    | 0.00      |
| Algae           | <i>Hydrolithon reinboldii</i>          | mmol/g/hr               | 26.50          | 26.50          | 0.00       | 36.20    | 36.20    | 0.00      |
| Algae           | <i>Lithophyllum flavescens</i>         | mmol/g/hr               | 27.10          | 27.30          | 0.20       | 36.10    | 36.40    | 0.30      |
| Algae           | <i>Lithophyllum sp.</i>                | mmol/g/hr               | 28.80          | 29.20          | 0.40       | 32.20    | 32.20    | 0.00      |
| Algae           | <i>Lithothamnion sp.</i>               | mmol/m <sup>2</sup> /hr | 29.98          | 32.00          | 2.02       | 36.19    | 36.19    | 0.00      |
| Algae           | <i>Neogoniolithon brassica-florida</i> | mmol/m <sup>2</sup> /hr | 28.22          | 31.61          | 3.39       | 38.00    | 38.00    | 0.00      |
| Algae           | <i>Neogoniolithon sp.</i>              | mmol/g/hr               | 24.90          | 25.10          | 0.20       | 31.50    | 31.80    | 0.30      |
| Algae           | <i>Neogoniolithon sp.</i>              | mmol/m <sup>2</sup> /hr | 20.40          | 32.00          | 11.60      | 35.20    | 36.19    | 0.99      |
| Algae           | <i>Porolithon onkodes</i>              | mmol/m <sup>2</sup> /hr | 26.90          | 27.50          | 0.60       | 35.30    | 36.10    | 0.80      |
| Algae           | <i>Sporolithon durum</i>               | mmol/m <sup>2</sup> /hr | 20.40          | 20.90          | 0.50       | 35.20    | 36.30    | 1.10      |
| Annelid         | <i>Hydroides crucigera</i>             | mmol/g/hr               | 24.90          | 25.20          | 0.30       | 31.50    | 31.70    | 0.20      |
| Coccolithophore | <i>Calcidiscus leptoporus</i>          | mmol#/hr                | 19.00          | 20.00          | 1.00       | 32.00    | 33.00    | 1.00      |
| Coccolithophore | <i>Emiliana huxleyi</i>                | mmol#/hr                | 10.00          | 20.00          | 10.00      | 32.00    | 38.20    | 6.20      |
| Coccolithophore | <i>Pleurochrysis carterae</i>          | mmol/m <sup>3</sup> /hr | 25.00          | 25.00          | 0.00       | 35.00    | 35.00    | 0.00      |
| Coccolithophore | <i>Pleurochrysis carterae</i>          | mmol/#                  | 25.00          | 25.00          | 0.00       | 35.00    | 35.00    | 0.00      |
| Coral           | <i>Acropora millepora</i>              | mmol/m <sup>2</sup> /hr | 25.00          | 25.40          | 0.40       | 34.40    | 34.40    | 0.00      |
| Coral           | <i>Acropora pulchra</i>                | mmol/m <sup>2</sup> /hr | 27.10          | 30.90          | 3.80       | 35.40    | 36.40    | 1.00      |
| Coral           | <i>Acropora solitaryensis</i>          | mmol/m <sup>2</sup> /hr | 18.00          | 21.30          | 3.30       | 34.00    | 34.00    | 0.00      |
| Coral           | <i>Acropora yongei</i>                 | mmol/m <sup>2</sup> /hr | 20.40          | 20.90          | 0.50       | 35.20    | 36.30    | 1.10      |
| Coral           | <i>Duncanopsammia</i>                  | mmol/m <sup>2</sup> /hr | 27.00          | 27.00          | 0.00       | 35.00    | 35.00    | 0.00      |

|                |                                    |                         |       |       |       |       |       |       |
|----------------|------------------------------------|-------------------------|-------|-------|-------|-------|-------|-------|
|                | <i>axifuga</i>                     |                         |       |       |       |       |       |       |
| Coral          | <i>Goniopora sp.</i>               | mmol/m <sup>2</sup> /hr | 26.50 | 26.50 | 0.00  | 36.20 | 36.20 | 0.00  |
| Coral          | <i>Lophelia pertusa</i>            | mmol/g/hr               | 7.50  | 7.50  | 0.00  | 34.60 | 34.60 | 0.00  |
| Coral          | <i>Montastraea cavernosa</i>       | mmol/m <sup>2</sup> /hr | 27.00 | 27.00 | 0.00  | 35.00 | 35.00 | 0.00  |
| Coral          | <i>Oculina arbuscula</i>           | mmol/g/hr               | 24.90 | 25.20 | 0.30  | 31.50 | 31.70 | 0.20  |
| Coral          | <i>Pavona cactus</i>               | mmol/m <sup>2</sup> /hr | 27.10 | 27.30 | 0.20  | 36.10 | 36.40 | 0.30  |
| Coral          | <i>Plesiastrea versipora</i>       | mmol/m <sup>2</sup> /hr | 20.50 | 20.90 | 0.40  | 36.30 | 36.30 | 0.00  |
| Coral          | <i>Pocillopora damicornis</i>      | mmol/g/hr               | 27.42 | 27.42 | 0.00  | 35.00 | 35.00 | 0.00  |
| Coral          | <i>Pocillopora damicornis</i>      | mmol/m <sup>2</sup> /hr | 20.40 | 29.34 | 8.94  | 35.06 | 36.40 | 1.34  |
| Coral          | <i>Pocillopora verrucosa</i>       | mmol/m <sup>2</sup> /hr | 26.98 | 27.04 | 0.06  | 35.55 | 35.66 | 0.11  |
| Coral          | <i>Porites heronensis</i>          | mmol/m <sup>2</sup> /hr | 18.00 | 21.30 | 3.30  | 34.00 | 34.00 | 0.00  |
| Coral          | <i>Porites rus</i>                 | mmol/m <sup>2</sup> /hr | 27.10 | 27.30 | 0.20  | 36.10 | 36.40 | 0.30  |
| Coral          | <i>Siderastrea radians</i>         | mmol/m <sup>2</sup> /hr | 20.02 | 30.75 | 10.73 | 32.24 | 47.25 | 15.00 |
| Coral          | <i>Solenastrea hyades</i>          | mmol/m <sup>2</sup> /hr | 20.02 | 30.75 | 10.73 | 32.24 | 47.25 | 15.00 |
| Coral          | <i>Stylophora pistillata</i>       | mmol/m <sup>2</sup> /hr | 23.33 | 28.33 | 5.00  | 40.00 | 40.00 | 0.00  |
| Crustacean     | <i>Amphibalanus improvisus</i>     | mmol/g/hr               | 19.50 | 19.50 | 0.00  | 17.00 | 17.00 | 0.00  |
| Crustacean     | <i>Callinectes sapidus</i>         | mmol/g/hr               | 24.90 | 25.10 | 0.20  | 31.80 | 32.10 | 0.30  |
| Crustacean     | <i>Homarus americanus</i>          | mmol/g/hr               | 24.90 | 25.10 | 0.20  | 31.80 | 32.10 | 0.30  |
| Crustacean     | <i>Penaeus plebejus</i>            | mmol/g/hr               | 24.90 | 25.10 | 0.20  | 31.80 | 32.10 | 0.30  |
| Crustacean     | <i>Semibalanus balanoides</i>      | mmol/g/hr               | 4.92  | 9.80  | 4.88  | 33.50 | 33.70 | 0.20  |
| Dinoflagellate | <i>Alexandrium sp.</i>             | 1/hr                    | 18.00 | 18.00 | 0.00  | 35.00 | 35.00 | 0.00  |
| Dinoflagellate | <i>Ceratium lineatum</i>           | #/hr                    | 15.00 | 15.00 | 0.00  | 30.00 | 30.00 | 0.00  |
| Dinoflagellate | <i>Gonyaulax sp.</i>               | 1/hr                    | 18.00 | 18.00 | 0.00  | 35.00 | 35.00 | 0.00  |
| Dinoflagellate | <i>Heterocapsa triquetra</i>       | #/hr                    | 15.00 | 15.00 | 0.00  | 30.00 | 30.00 | 0.00  |
| Dinoflagellate | <i>Karenia mikimotoi</i>           | 1/hr                    | 25.00 | 25.00 | 0.00  | 30.00 | 30.00 | 0.00  |
| Dinoflagellate | <i>Lingulodinium polyedrum</i>     | 1/hr                    | 18.00 | 18.00 | 0.00  | 35.00 | 35.00 | 0.00  |
| Dinoflagellate | <i>Prorocentrum micans</i>         | 1/hr                    | 18.00 | 18.00 | 0.00  | 35.00 | 35.00 | 0.00  |
| Dinoflagellate | <i>Prorocentrum minimum</i>        | #/hr                    | 15.00 | 15.00 | 0.00  | 30.00 | 30.00 | 0.00  |
| Dinoflagellate | <i>Symbiodinium sp.</i>            | #/hr                    | 26.00 | 26.00 | 0.00  | 35.00 | 35.00 | 0.00  |
| Dinoflagellate | <i>Thoracosphaera heimii</i>       | mmol/hr                 | 15.00 | 15.00 | 0.00  | 34.00 | 34.00 | 0.00  |
| Echinoderm     | <i>Arbacia punctulata</i>          | mmol/g/hr               | 24.90 | 25.10 | 0.20  | 31.70 | 31.90 | 0.20  |
| Echinoderm     | <i>Echinometra viridis</i>         | %                       | 19.70 | 30.20 | 10.50 | 32.00 | 32.12 | 0.12  |
| Echinoderm     | <i>Echinometra viridis</i>         | 1/hr                    | 20.30 | 30.00 | 9.70  | 32.00 | 32.12 | 0.12  |
| Echinoderm     | <i>Eucidaris tribuloides</i>       | mmol/g/hr               | 24.90 | 25.10 | 0.20  | 31.70 | 31.90 | 0.20  |
| Foraminifera   | <i>Ammonia sp.</i>                 | mmol/#/hr               | 26.00 | 26.00 | 0.00  | 32.60 | 32.80 | 0.20  |
| Foraminifera   | <i>Amphistegina lessonii</i>       | %/hr                    | 24.10 | 24.20 | 0.10  | 33.46 | 33.46 | 0.00  |
| Foraminifera   | <i>Globigerinella siphonifera</i>  | mmol/hr                 | 18.00 | 31.00 | 13.00 | 32.10 | 44.30 | 12.20 |
| Foraminifera   | <i>Globigerinoides ruber</i>       | mmol/hr                 | 18.00 | 30.00 | 12.00 | 32.10 | 44.30 | 12.20 |
| Foraminifera   | <i>Marginopora rossi</i>           | %/hr                    | 25.00 | 25.00 | 0.00  | 35.00 | 35.00 | 0.00  |
| Foraminifera   | <i>Marginopora vertebralis</i>     | %/hr                    | 28.50 | 28.50 | 0.00  | 35.00 | 35.20 | 0.20  |
| Foraminifera   | <i>Marginopora vertebralis</i>     | mmol/hr                 | 28.00 | 34.00 | 6.00  | 33.00 | 33.00 | 0.00  |
| Foraminifera   | <i>Marginopora vertebralis</i>     | mmol/g/hr               | 24.10 | 24.20 | 0.10  | 33.46 | 33.46 | 0.00  |
| Foraminifera   | <i>Neogloboquadrina pachyderma</i> | mmol/#/hr               | 1.05  | 4.10  | 3.05  | 34.50 | 34.50 | 0.00  |

|              |                                  |                         |       |       |       |       |       |       |
|--------------|----------------------------------|-------------------------|-------|-------|-------|-------|-------|-------|
| Foraminifera | <i>Operculina ammonoides</i>     | mmol/g/hr               | 25.00 | 25.00 | 0.00  | 37.00 | 37.00 | 0.00  |
| Gastropod    | <i>Concholepas concholepas</i>   | mmol/g/hr               | 15.62 | 19.27 | 3.65  | 34.53 | 34.61 | 0.08  |
| Gastropod    | <i>Crepidula fornicata</i>       | mmol/g/hr               | 9.50  | 25.10 | 15.60 | 31.70 | 34.60 | 2.90  |
| Gastropod    | <i>Cyclope neritea</i>           | mmol/g/hr               | 20.00 | 24.03 | 4.03  | 38.00 | 38.00 | 0.00  |
| Gastropod    | <i>Littorina littorea</i>        | µm (shell thickness)    | 24.90 | 25.10 | 0.20  | 31.70 | 31.90 | 0.20  |
| Gastropod    | <i>Littorina littorea</i>        | mmol/g/hr               | 15.00 | 15.00 | 0.00  | 35.00 | 35.00 | 0.00  |
| Gastropod    | <i>Nassarius corniculus</i>      | mmol/g/hr               | 20.00 | 24.03 | 4.03  | 38.00 | 38.00 | 0.00  |
| Gastropod    | <i>Strombus alatus</i>           | mmol/g/hr               | 24.90 | 25.10 | 0.20  | 31.70 | 31.90 | 0.20  |
| Gastropod    | <i>Urosalpinx cinerea</i>        | mmol/g/hr               | 24.90 | 25.10 | 0.20  | 31.70 | 31.90 | 0.20  |
| Mollusks     | <i>Argopecten irradians</i>      | mmol/g/hr               | 25.00 | 25.10 | 0.10  | 31.70 | 32.10 | 0.40  |
| Mollusks     | <i>Argopecten purpuratus</i>     | mmol/g/hr               | 18.29 | 18.37 | 0.08  | 34.00 | 34.00 | 0.00  |
| Mollusks     | <i>Azumapecten farreri</i>       | mmol/g/hr               | 16.00 | 16.00 | 0.00  | 28.00 | 28.00 | 0.00  |
| Mollusks     | <i>Cerastoderma edule</i>        | mmol/g/hr               | 15.71 | 17.87 | 2.16  | 33.86 | 34.71 | 0.85  |
| Mollusks     | <i>Chamelea gallina</i>          | mmol/g/hr               | 23.00 | 23.10 | 0.10  | 33.92 | 33.93 | 0.01  |
| Mollusks     | <i>Crassostrea gigas</i>         | mmol/g/hr               | 20.00 | 20.00 | 0.00  | 30.00 | 30.00 | 0.00  |
| Mollusks     | <i>Crassostrea virginica</i>     | mmol/g/hr               | 20.00 | 32.00 | 12.00 | 16.00 | 32.10 | 16.10 |
| Mollusks     | <i>Mercenaria mercenaria</i>     | mmol/g/hr               | 25.00 | 25.10 | 0.10  | 31.70 | 32.10 | 0.40  |
| Mollusks     | <i>Mya arenaria</i>              | mmol/g/hr               | 25.00 | 25.10 | 0.10  | 31.70 | 32.10 | 0.40  |
| Mollusks     | <i>Mytilus californianus</i>     | mmol/m <sup>2</sup> /hr | 11.41 | 16.56 | 5.15  | 27.16 | 30.22 | 3.06  |
| Mollusks     | <i>Mytilus edulis</i>            | mmol/g/hr               | 20.00 | 25.10 | 5.10  | 30.00 | 32.10 | 2.10  |
| Mollusks     | <i>Mytilus galloprovincialis</i> | mmol/g/hr               | 37.92 | 38.00 | 0.08  | 37.92 | 38.00 | 0.08  |
| Mollusks     | <i>Pecten maximus</i>            | mmol/g/hr               | 8.90  | 12.40 | 3.50  | 34.88 | 35.64 | 0.76  |
| Pteropod     | <i>Cavolinia inflexa</i>         | mm (shell length)       | 13.00 | 13.00 | 0.00  | 38.00 | 38.00 | 0.00  |
| Pteropod     | <i>Limacina helicina</i>         | µm (shell thickness)    | 0.50  | 5.00  | 4.50  | 34.50 | 34.80 | 0.30  |
| Pteropod     | <i>Limacina helicina</i>         | mmol/g/hr               | 2.00  | 7.80  | 5.80  | 34.30 | 34.70 | 0.40  |
| Pteropod     | <i>Limacina helicina</i>         | mm (shell length)       | 9.07  | 11.52 | 2.45  | 31.73 | 33.13 | 1.40  |
| Pteropod     | <i>Limacina retroversa</i>       | mm (shell length)       | 2.00  | 7.00  | 5.00  | 34.30 | 34.30 | 0.00  |

**Table S6:** Regression analyses with fitted second-order polynomial equation exploring TA:DIC and  $\Omega_{ar}$  correlation over the 0-50 using various regional datasets and global GLODAP datasets. Shown are the coefficients for the second-order polynomial equation (see also Fig. 1), as well as goodness of fit (R<sup>2</sup>), significance (p), standard error of regression (ser) and number of observations (#).

| Region     | b1     | b2       | b3      | b4      | rsquared | pvalue | ser   | #obs  |
|------------|--------|----------|---------|---------|----------|--------|-------|-------|
| Arctic     | 66.84  | -206.99  | 199.39  | -58.81  | 0.96     | 0      | 0.094 | 8991  |
| N-Pacific  | 346.73 | -972.25  | 896.08  | -269.98 | 0.991    | 0      | 0.05  | 6085  |
| C-Pacific  | 297.07 | -817.72  | 737.24  | -215.9  | 0.99     | 0      | 0.063 | 13101 |
| N-Atlantic | 411.4  | -1135.05 | 1030.06 | -305.76 | 0.993    | 0      | 0.044 | 4914  |
| C-Atlantic | 166.02 | -500.37  | 483.06  | -148.61 | 0.968    | 0      | 0.109 | 5466  |
| Indian     | 189.24 | -528.16  | 479.47  | -139.8  | 0.971    | 0      | 0.063 | 3560  |
| Southern   | 436.42 | -1216.31 | 1116.76 | -336.22 | 0.997    | 0      | 0.022 | 7052  |
| Global     | 86.94  | -254.47  | 233.73  | -65.8   | 0.99     | 0      | 0.095 | 56138 |



**Figure S1:** The effect of changes in TA and DIC on the properties of seawater ( $S=34.68$ ,  $T=16^\circ\text{C}$ ,  $[\text{SiO}_2]=50\text{ }\mu\text{mol/kg}$ ,  $[\text{PO}_4^{3-}]=0.5\text{ }\mu\text{mol/kg}$ ,  $\text{TA}=2303\text{ }\mu\text{mol/kg}$ ,  $\text{DIC}=2034\text{ }\mu\text{mol/kg}$ ), adapted from Schulz et al. (2023). Orange dots represent GLODAP data for surface waters (0-50m depth). Subfigures show  $\text{pH}_T$ , aragonite saturation state and  $\text{pCO}_2$ . Calculations were carried out with the Python version of CO2SYS (Humphreys et al., 2022) using the stoichiometric dissociation constants for carbonic acid from Sulpis et al. (2020), for sulfuric acid by Dickson et al. (1990) and for total boron from Uppström (1974). The solid white line indicates the effect of adding NaOH and the dashed white line indicates the effect of adding  $\text{Na}_2\text{CO}_3$ . This grouping of lines can be translated so that its initial position moves elsewhere on these figures, to visualize different initial conditions.

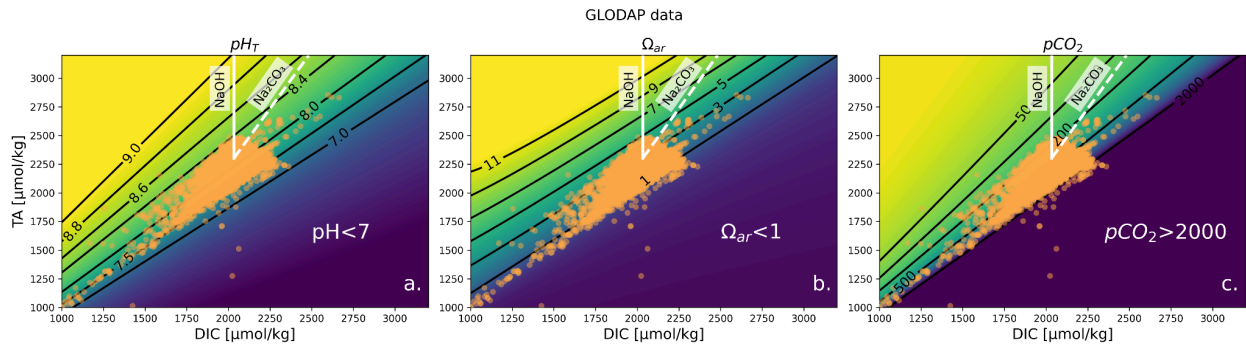

**Figure S2:** TA:DIC vs  $\text{pH}_T$  and  $\Omega_{ar}$  from the chemical data of the experimental OA treatments.

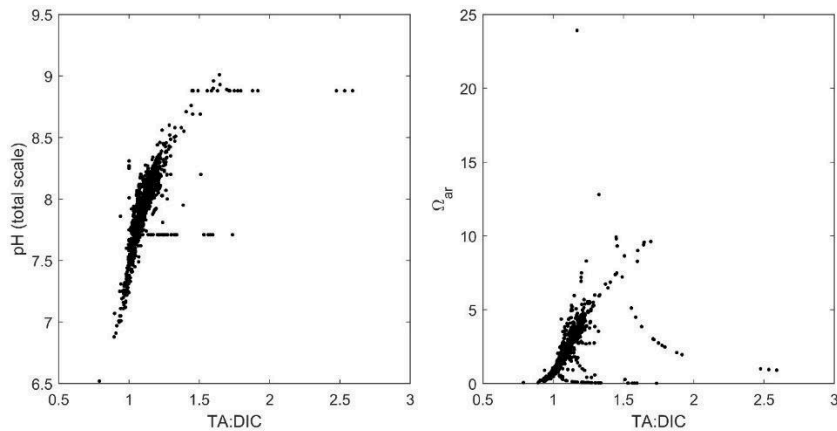

**Figure S3:** The range of observed pH and DIC and TA values (as represented by the TA:DIC ratio) values and the relationship with the best fitted curve between TA:DIC vs. pH across regional (a-g) and global (h) scales based on the observational GLODAP data set averaged over 0-50 m depth.

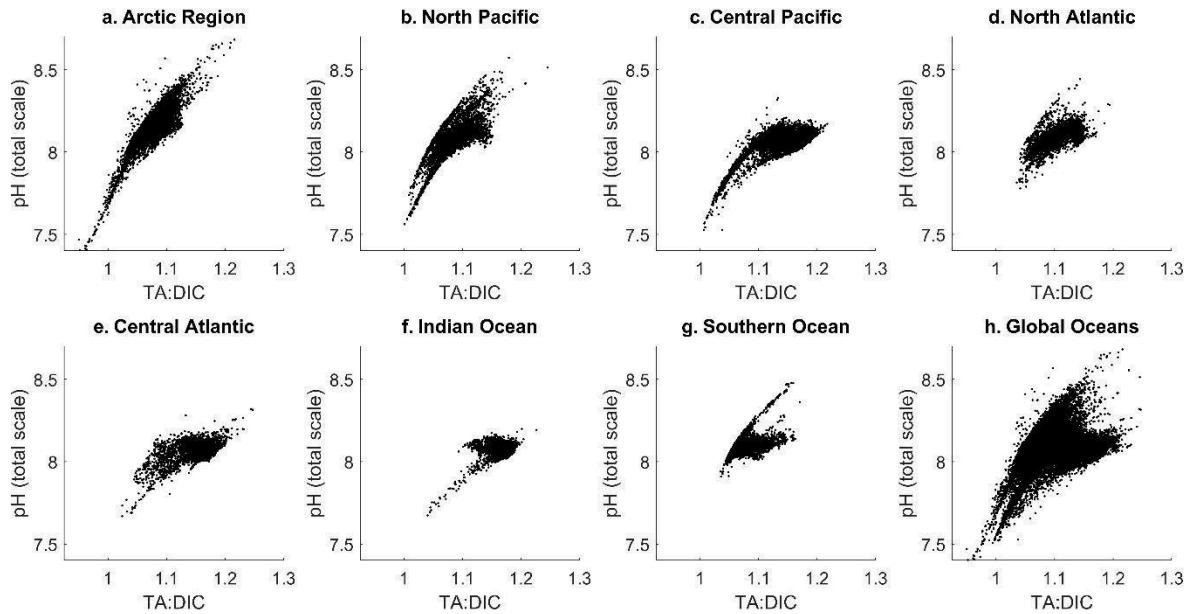

**Figure S4:** Raw experimental data extracted from the OA studies or databases to which the regression line with prediction error margins was fitted at various additions of alkalinity for the examined species (in alphabetical order). The uncertainty interval indicates a 90 % prediction interval four standard deviations. The vertical gray dotted line represents the baseline and the red line indicates zero net dissolution (calcification rate is equal to 0; dissolution rate = calcification rate).

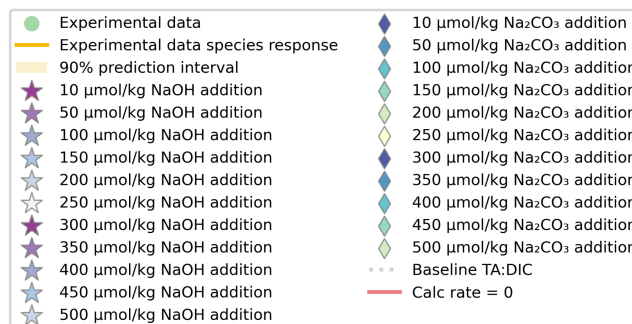

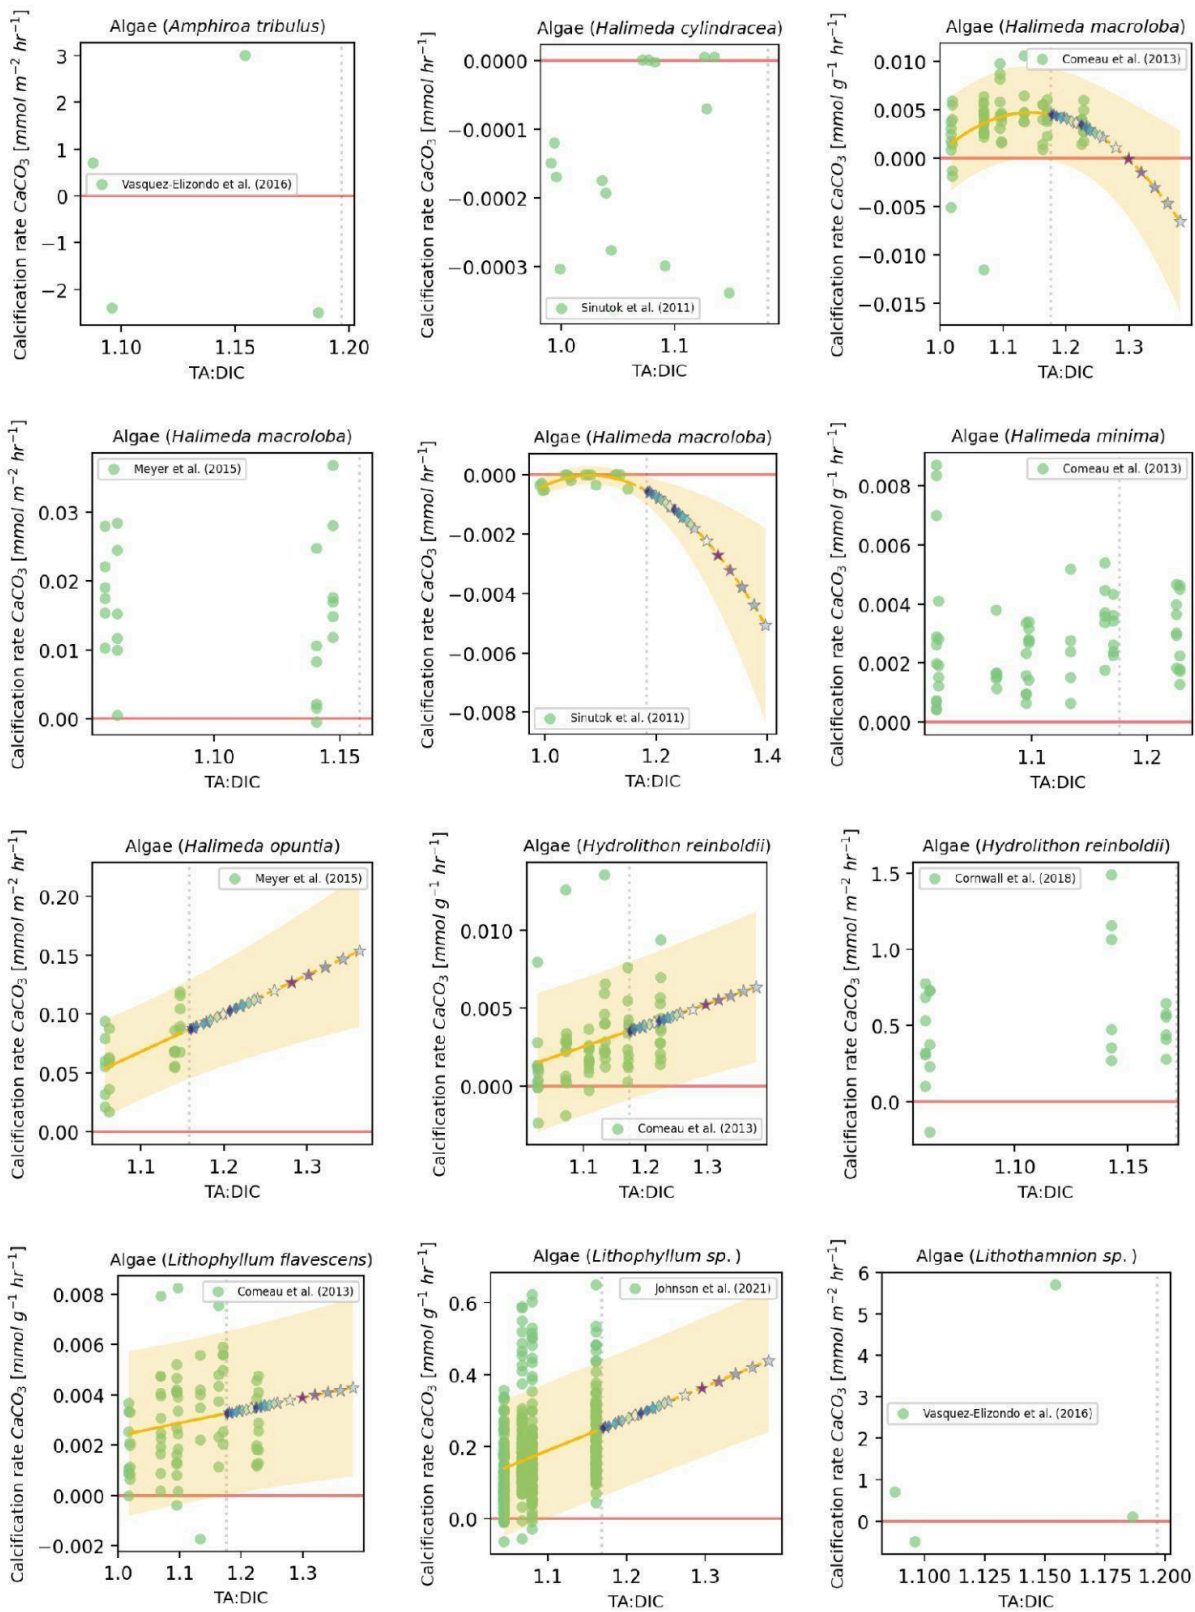

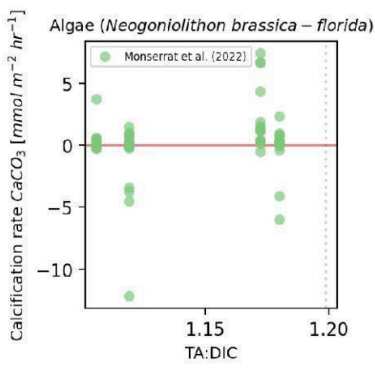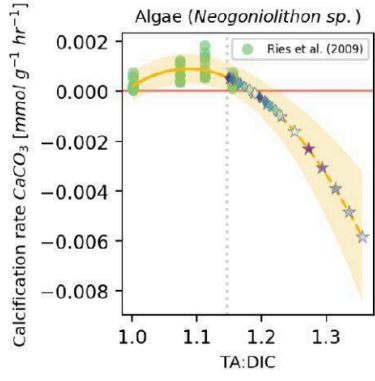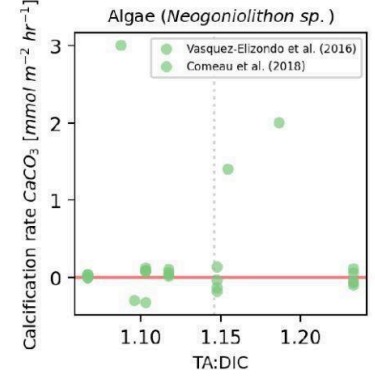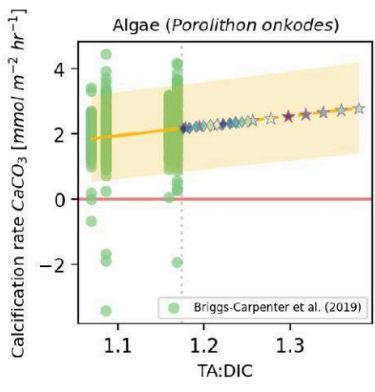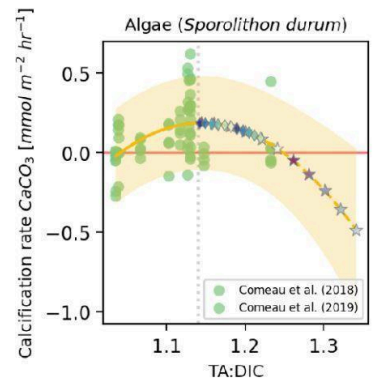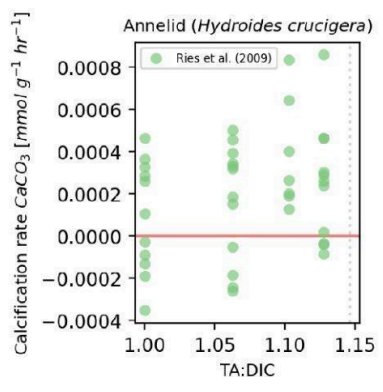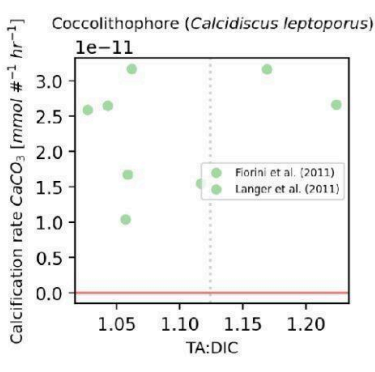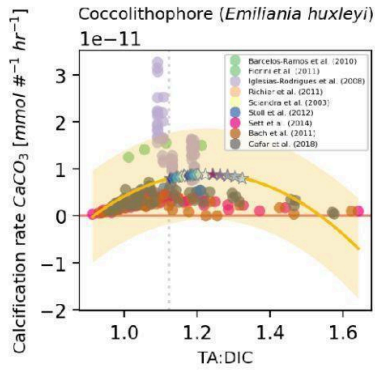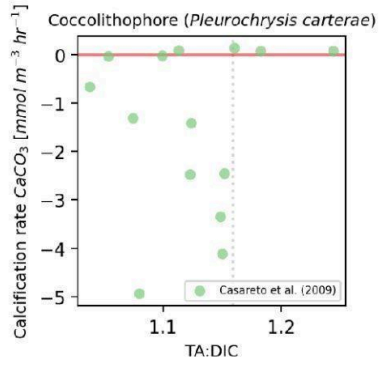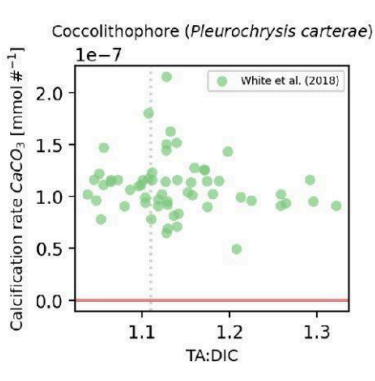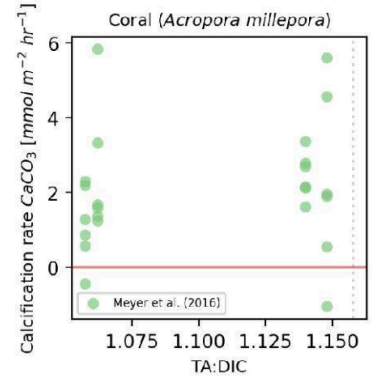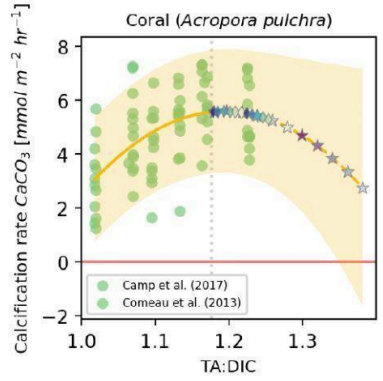

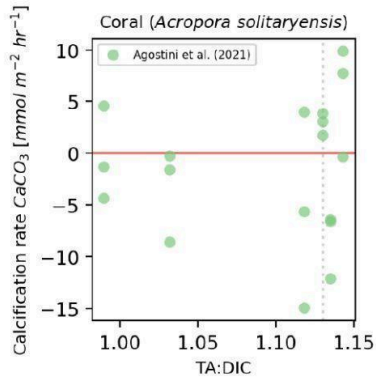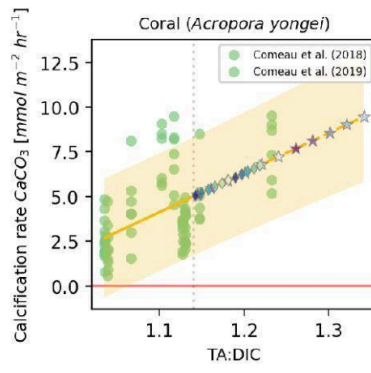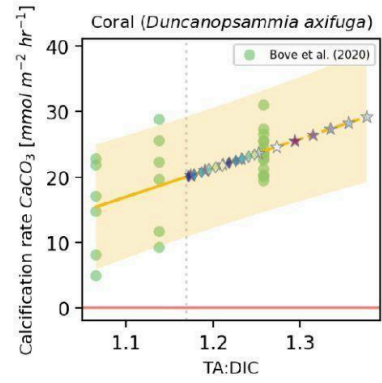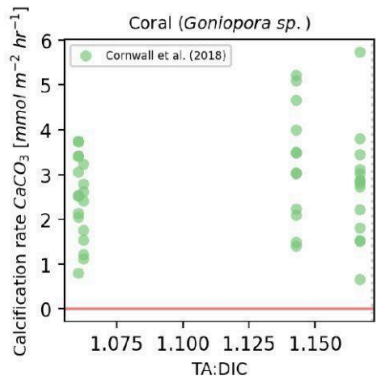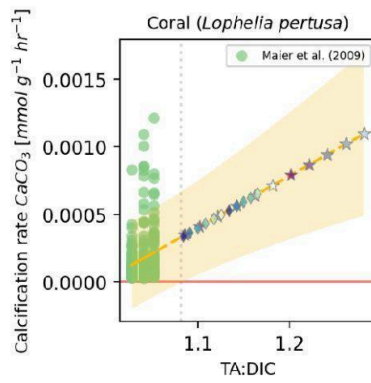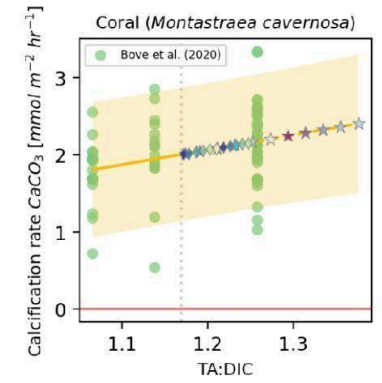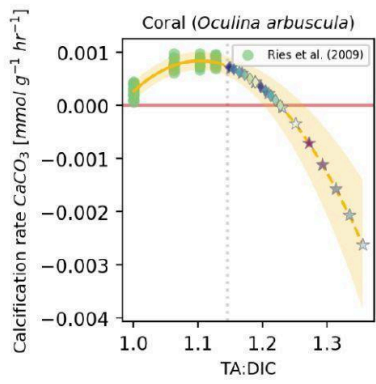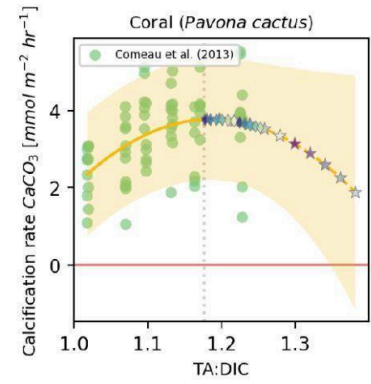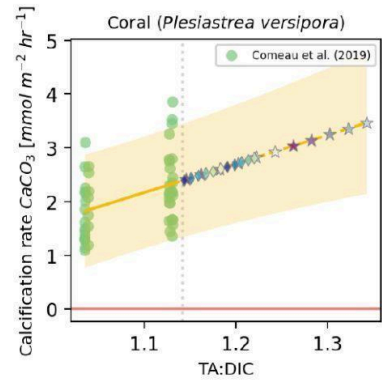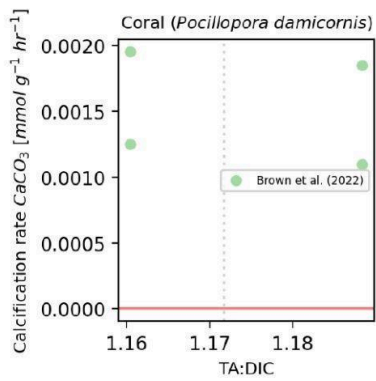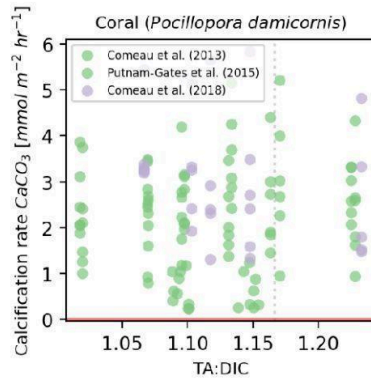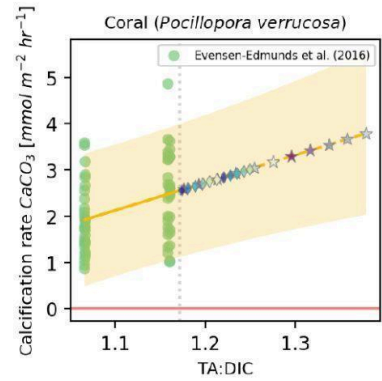

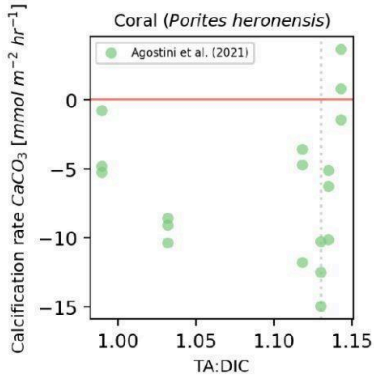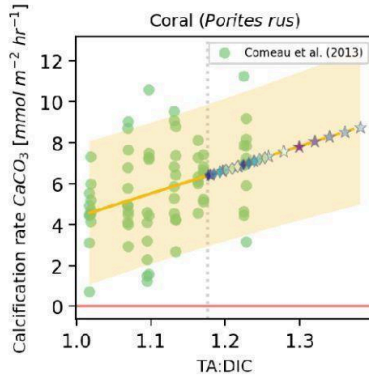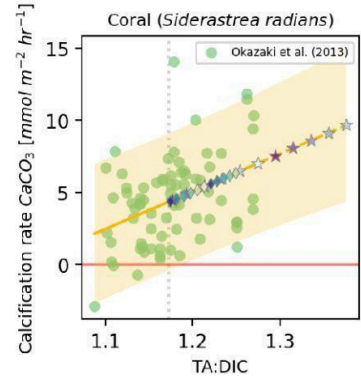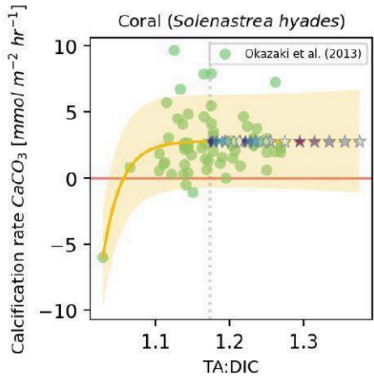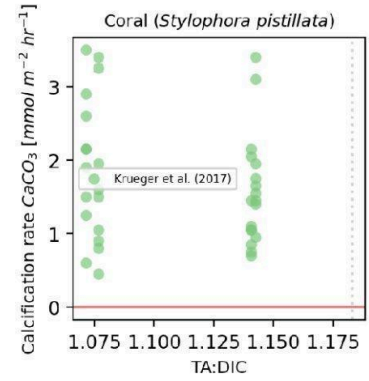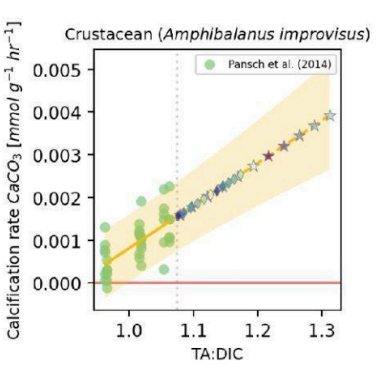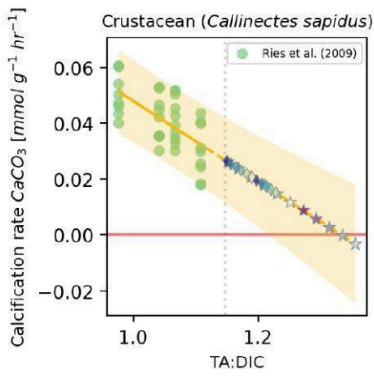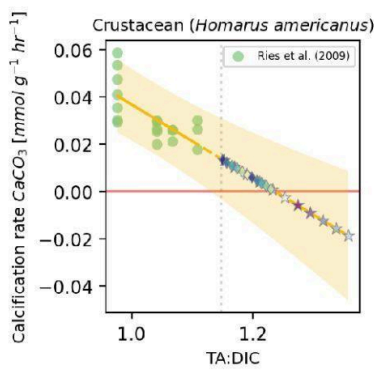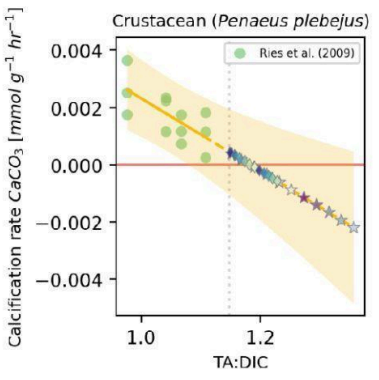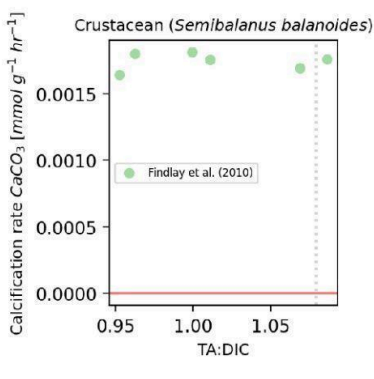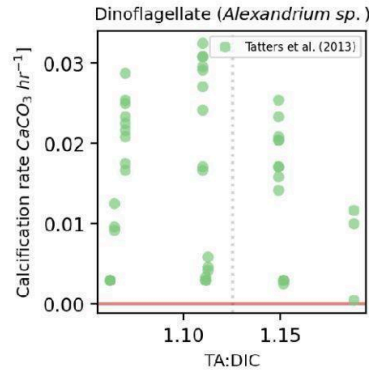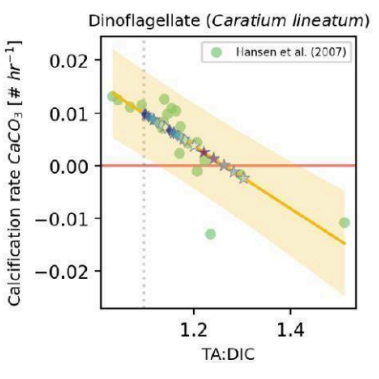

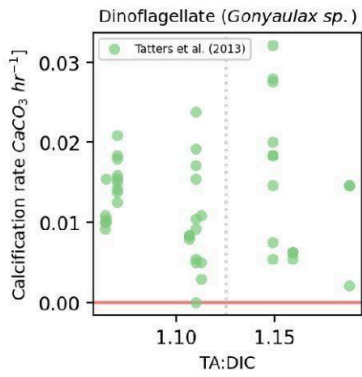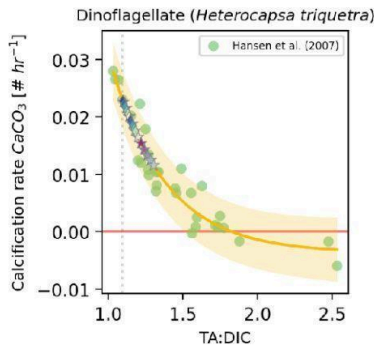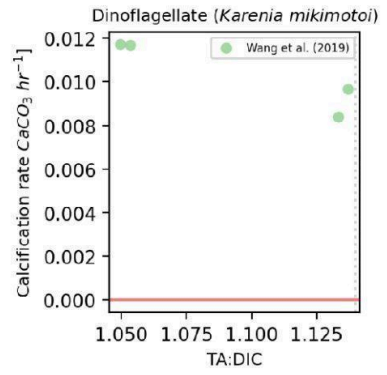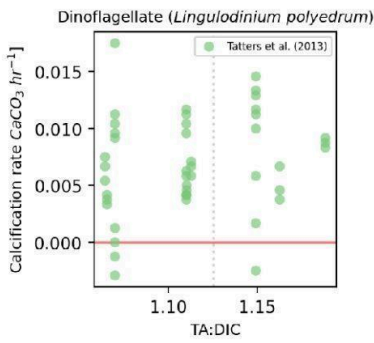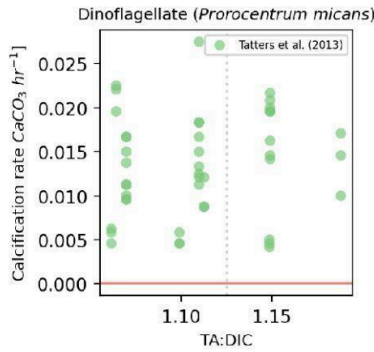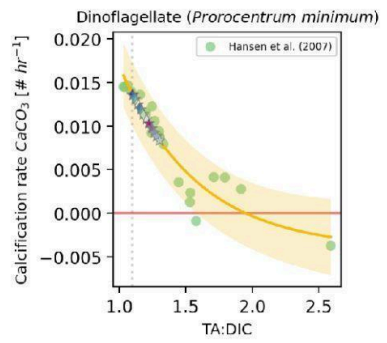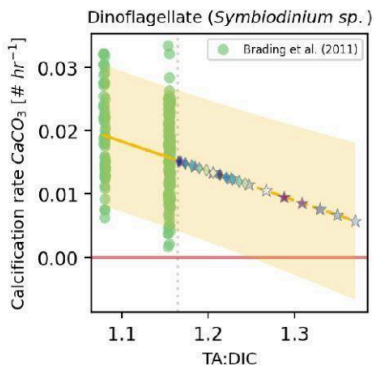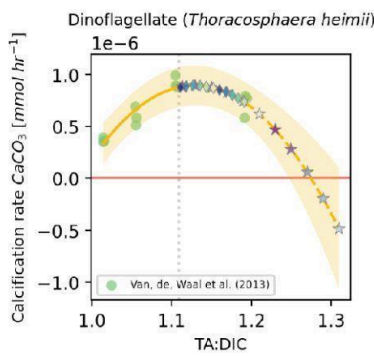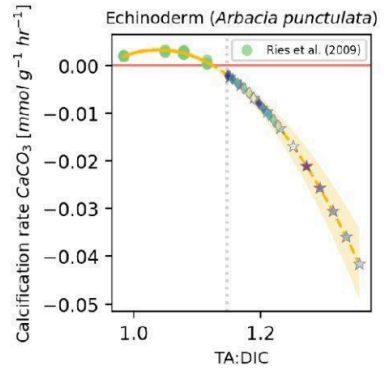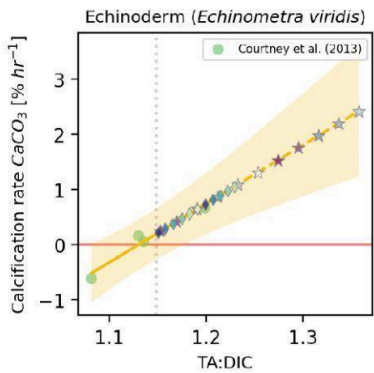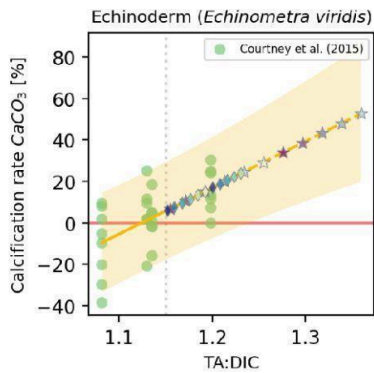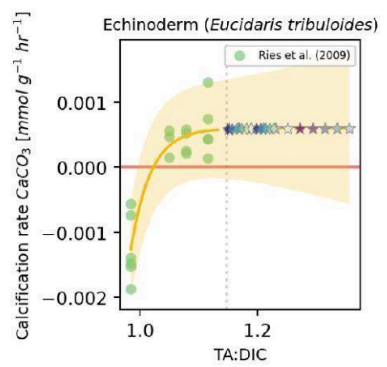

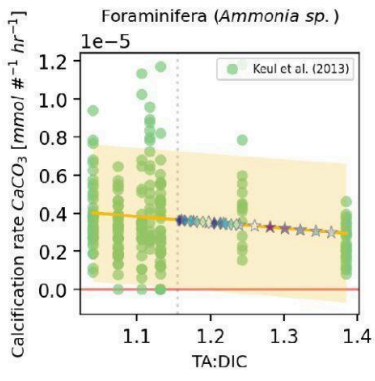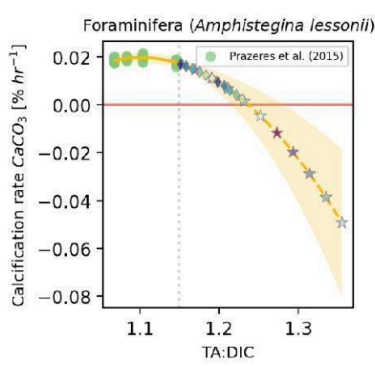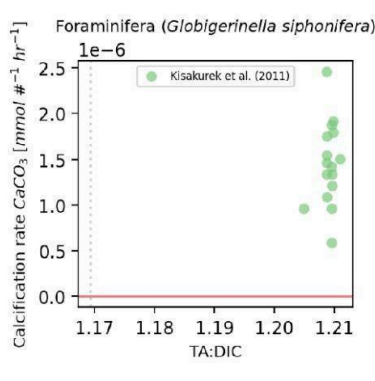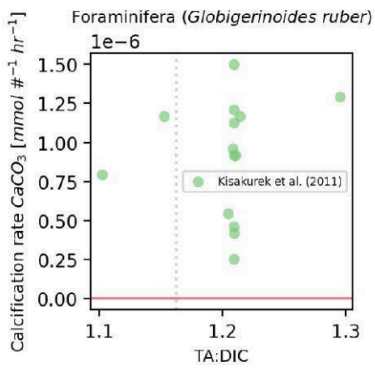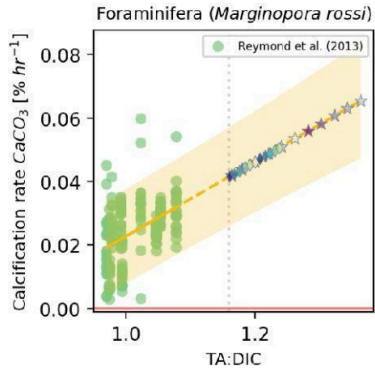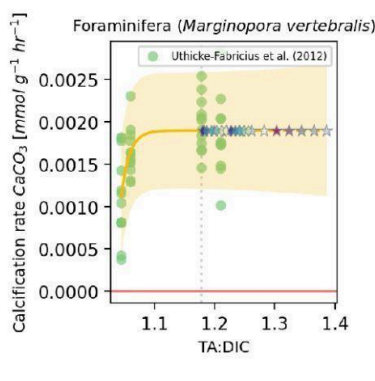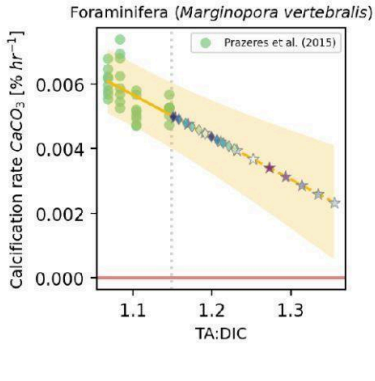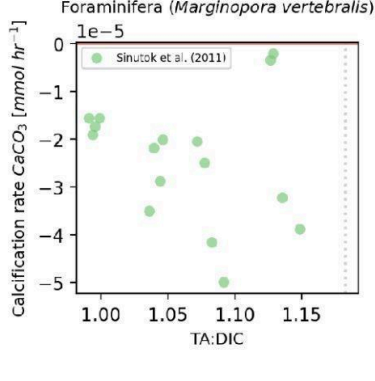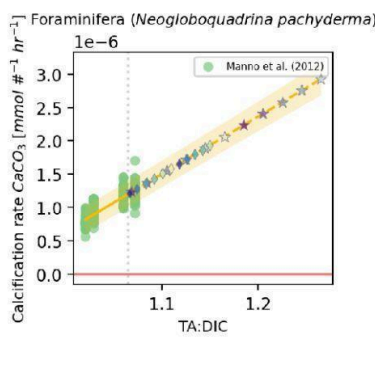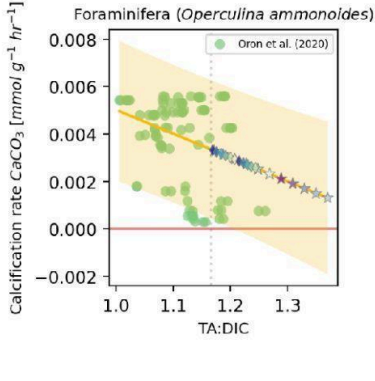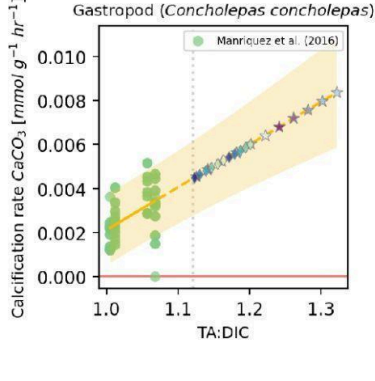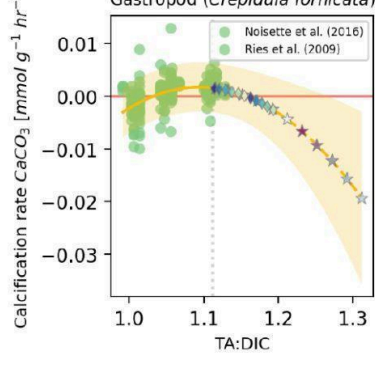



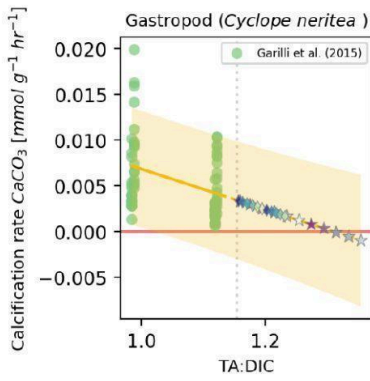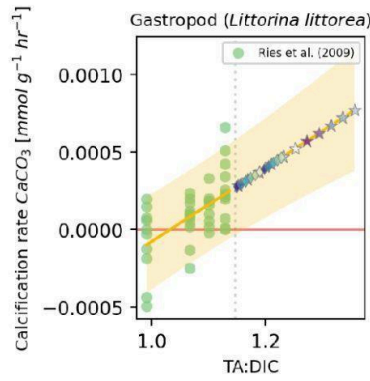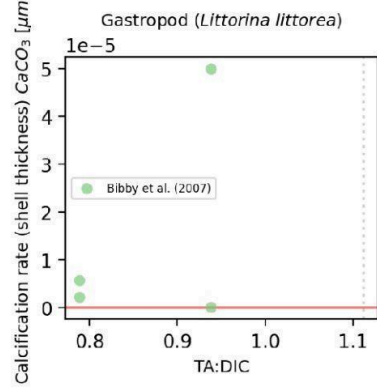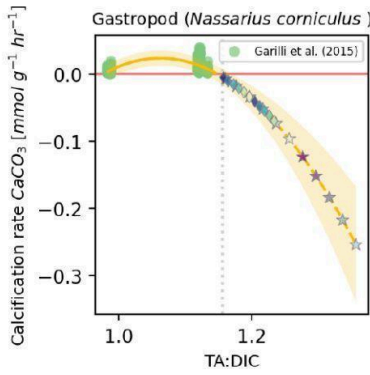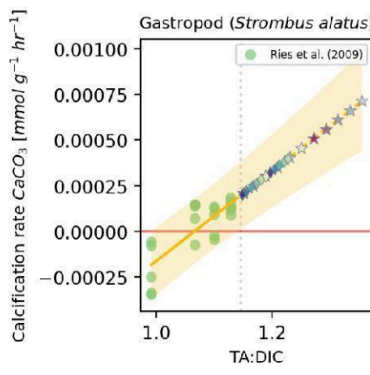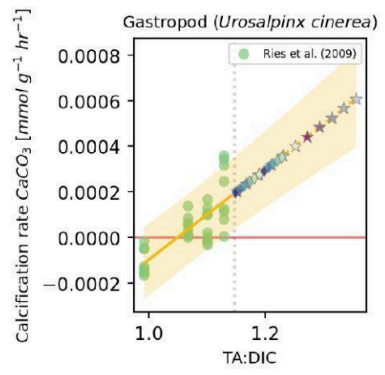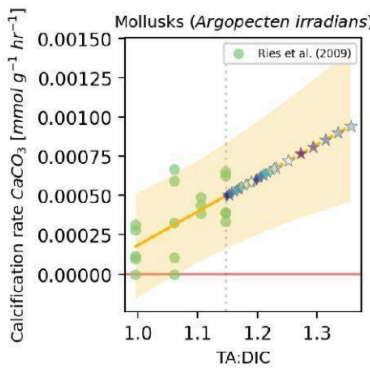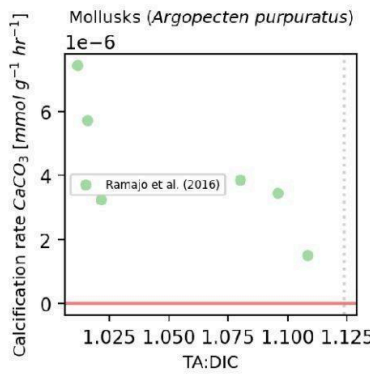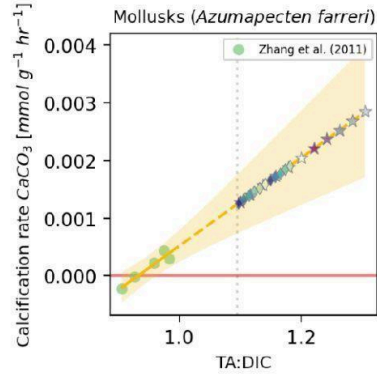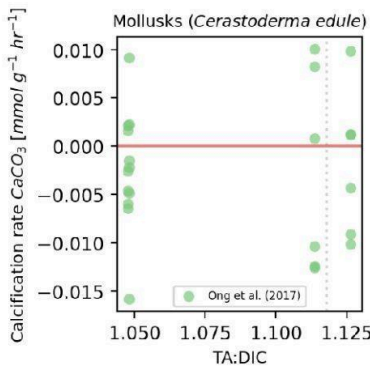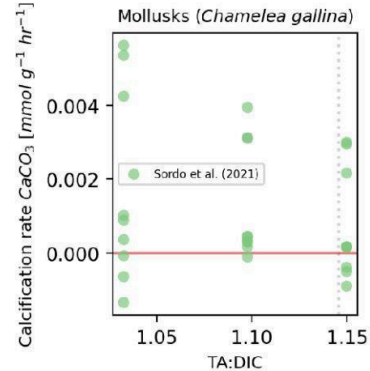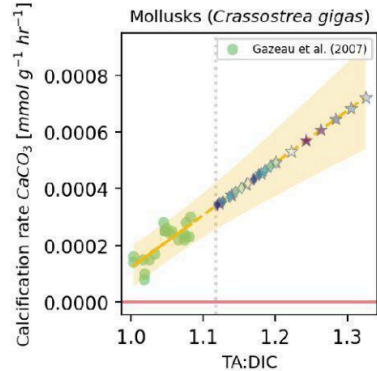

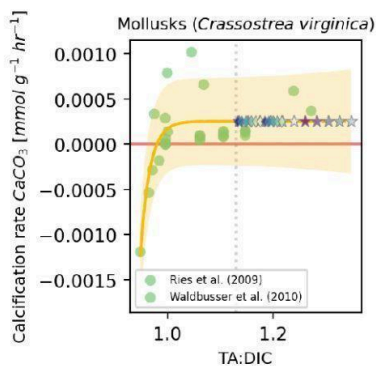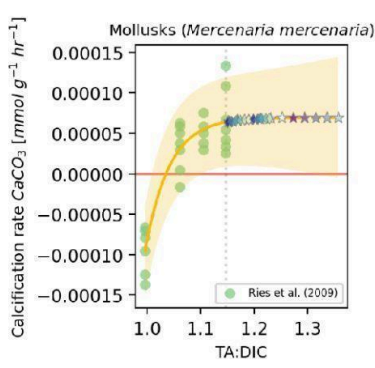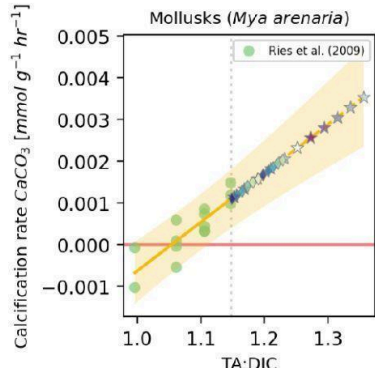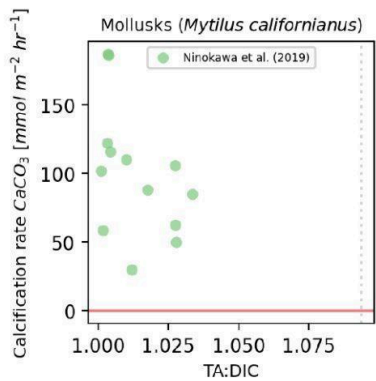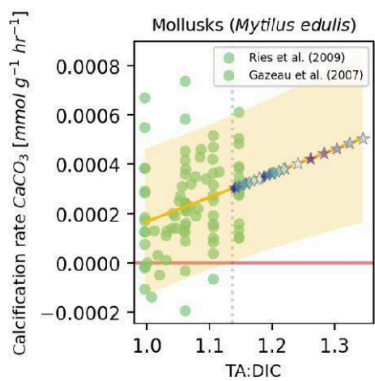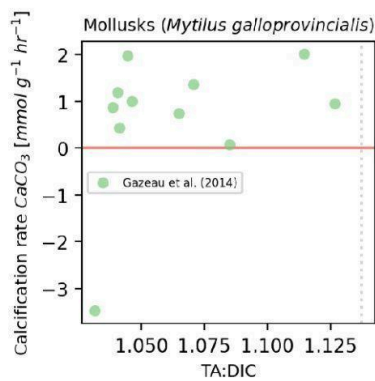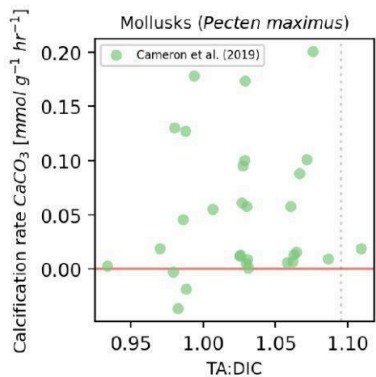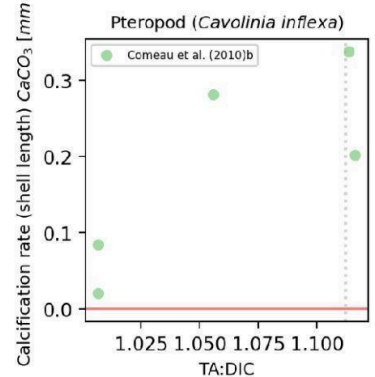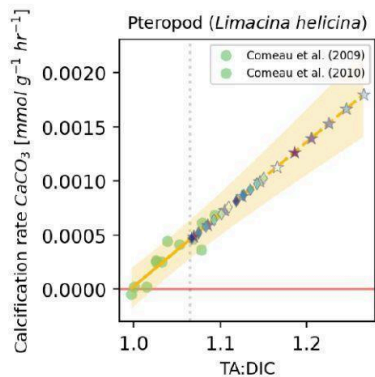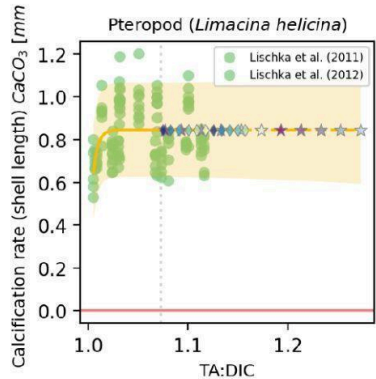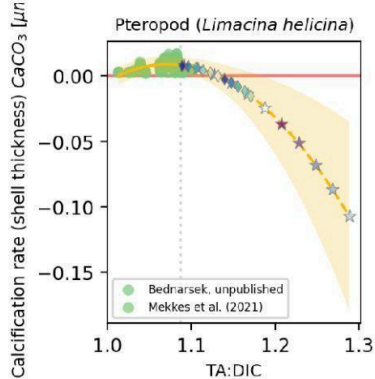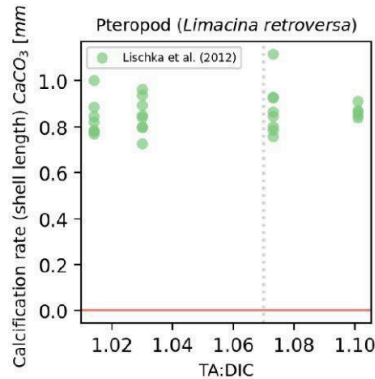

**Figure S5:** Mechanistic rate equation and parameters ( $a = 2.31e5$ ,  $b = 3.55e2$  mol/kg,  $c = 2.19e5$  kg/mol,  $d = 3.76e7$  kg/mol) taken from Bach et al. (2015) and calculated using experimental data for '*Calcidiscus leptoporus*' (used data from the studies indicated in legend). No significant correlation (p-value = 0.46) when applying a quadratic regression to this data means a neutral response.

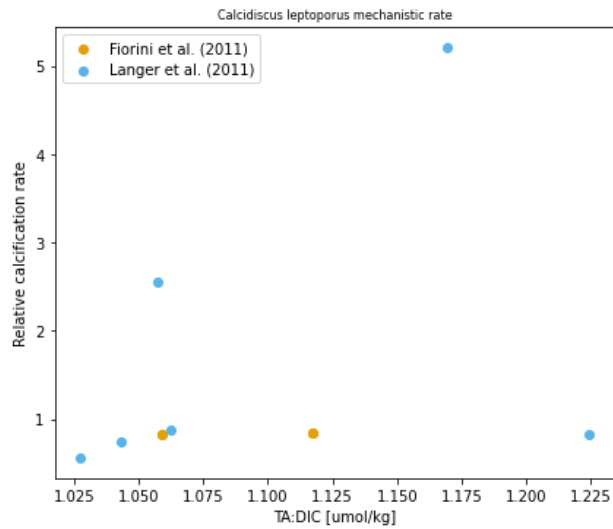

**Figure S6:** Substrate-to-inhibitor ratio (SIR) (i.e. the bicarbonate ion to hydrogen ion concentration ratio) for coccolithophore, coral and mollusk group experimental data. Bicarbonate ion and hydrogen ion concentration calculated using TA and DIC data.

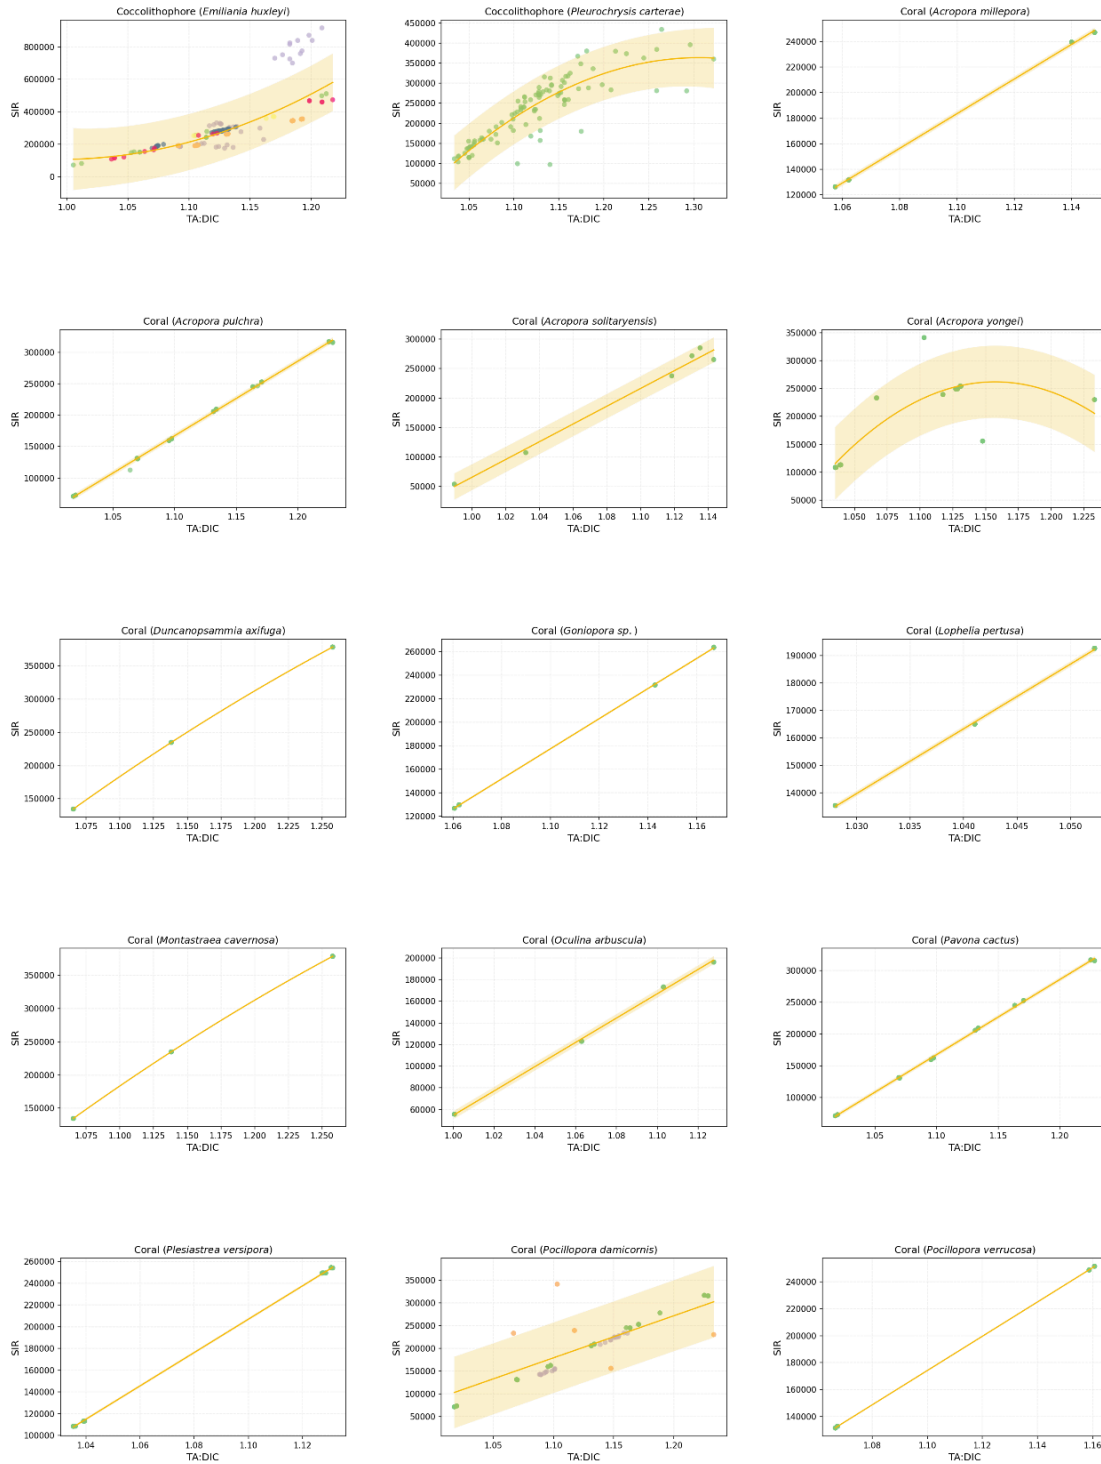

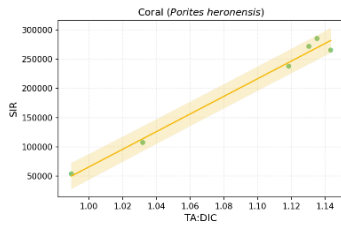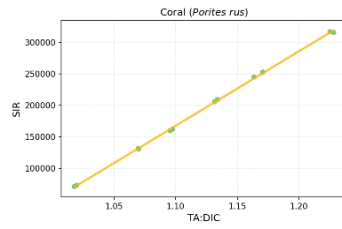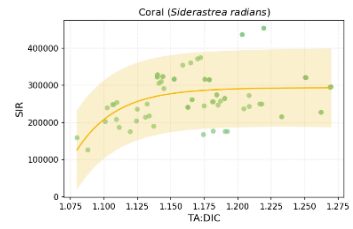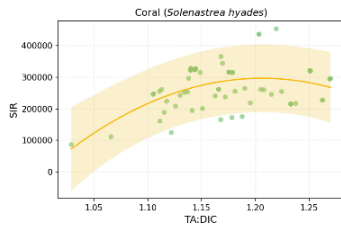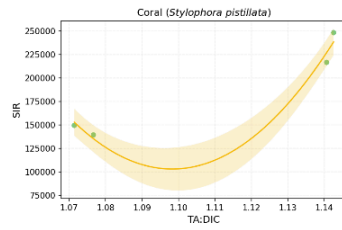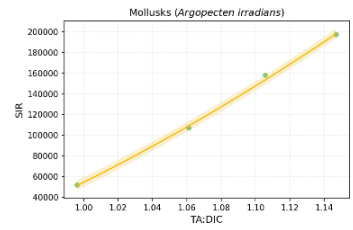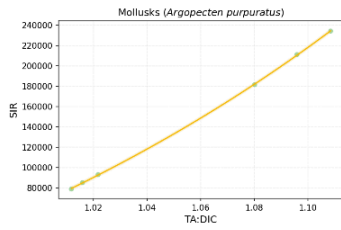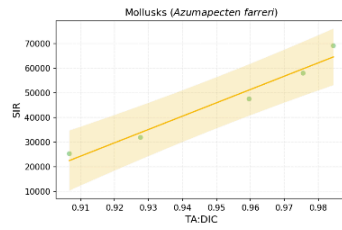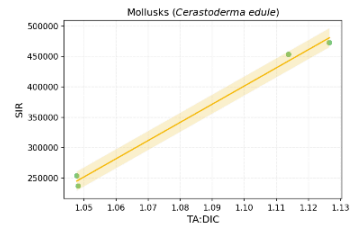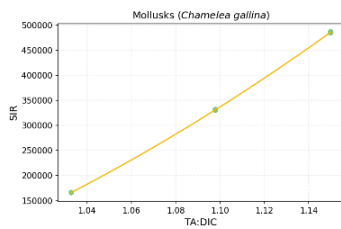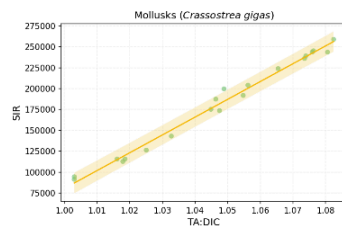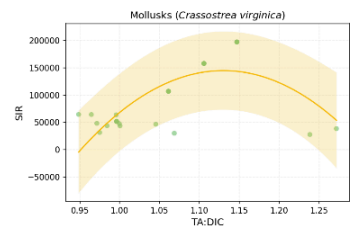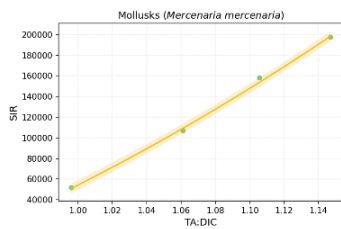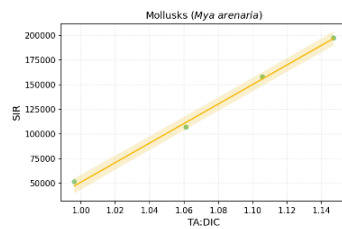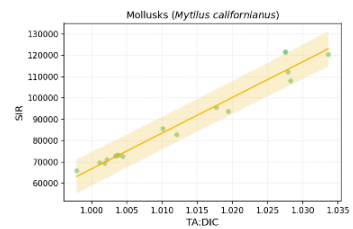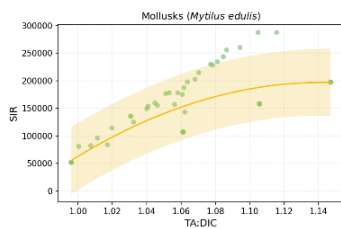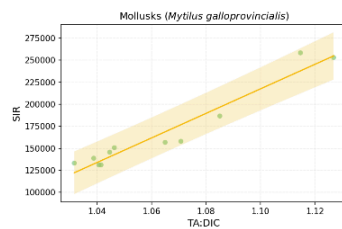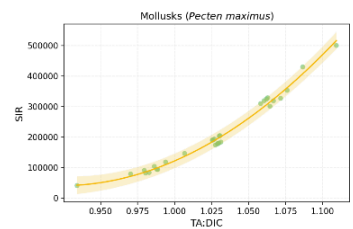

Supplement: Supplementary file 1 [file bg-22-473-2025-supplement.pdf]
